# Supplementary material for: An Enantiospecific Synthesis of 5-epi-α-Bulnesene
Source: MDPI journal article supplement (doi:10.3390/molecules28093900), 2023-05-05
Supplement: s1 [file s1]

# An Enantiospecific Synthesis of 5-*epi*- $\alpha$ -Bulnesene

Jiarui Zong and Jeremy Robertson\*

\* Correspondence: jeremy.robertson@chem.ox.ac.uk

| NMR spectra                                                                                                                                        | Page |
|----------------------------------------------------------------------------------------------------------------------------------------------------|------|
| <i>(2RS,5R)</i> -2-Methyl-5-( <i>prop</i> -1-en-2-yl)cycloheptan-1-one ( <b>7</b> )                                                                |      |
| <sup>1</sup> H NMR spectrum                                                                                                                        | S3   |
| <sup>13</sup> C NMR spectrum                                                                                                                       | S3   |
| <i>(5R)</i> -2-Methyl-5-( <i>prop</i> -1-en-2-yl)cyclohept-1-en-1-yl trifluoromethanesulfonate ( <b>9</b> )                                        |      |
| <sup>1</sup> H NMR spectrum                                                                                                                        | S4   |
| <sup>13</sup> C NMR spectrum                                                                                                                       | S4   |
| <i>(5R)</i> -1-( <i>But</i> -3-yn-1-yl)-2-methyl-5-( <i>prop</i> -1-en-2-yl)cyclohept-1-ene ( <b>10</b> )                                          |      |
| <sup>1</sup> H NMR spectrum                                                                                                                        | S5   |
| <sup>13</sup> C NMR spectrum                                                                                                                       | S5   |
| <i>(5R)</i> -1-(3-Iodobut-3-en-1-yl)-2-methyl-5-( <i>prop</i> -1-en-2-yl)cyclohept-1-ene ( <b>3</b> )                                              |      |
| <sup>1</sup> H NMR spectrum                                                                                                                        | S6   |
| <sup>13</sup> C NMR spectrum                                                                                                                       | S6   |
| <i>(6R)</i> -9-Methyl-6-( <i>prop</i> -1-en-2-yl)-1-vinylspiro[2.6]non-8-en-4-one ( <b>15</b> )                                                    |      |
| <sup>1</sup> H NMR spectrum                                                                                                                        | S7   |
| <sup>13</sup> C NMR spectrum                                                                                                                       | S7   |
| <i>(2RS,6R)</i> -2-( <i>But</i> -3-en-1-yl)-3-methyl-6-( <i>prop</i> -1-en-2-yl)cyclohept-3-en-1-one ( <b>18</b> )                                 |      |
| <sup>1</sup> H NMR spectrum                                                                                                                        | S8   |
| <sup>13</sup> C NMR spectrum                                                                                                                       | S8   |
| <i>(6R)</i> -2-( <i>But</i> -3-en-1-yl)-3-methyl-6-( <i>prop</i> -1-en-2-yl)cyclohept-2-en-1-one ( <b>19</b> )                                     |      |
| <sup>1</sup> H NMR spectrum                                                                                                                        | S9   |
| <sup>13</sup> C NMR spectrum                                                                                                                       | S9   |
| <i>(1RS,6R)</i> -2-( <i>But</i> -3-en-1-yl)-3-methyl-6-( <i>prop</i> -1-en-2-yl)cyclohept-2-en-1-ol ( <b>12</b> )                                  |      |
| <sup>1</sup> H NMR spectrum                                                                                                                        | S10  |
| <sup>13</sup> C NMR spectrum                                                                                                                       | S10  |
| <i>(3S,3aR,5R,8aR)</i> -3,8-Dimethyl-5-( <i>prop</i> -1-en-2-yl)-2,3,4,5,6,8a-hexahydroazulen-3a(1H)-ol ( <b>24</b> )                              |      |
| <sup>1</sup> H NMR spectrum                                                                                                                        | S11  |
| <sup>13</sup> C NMR spectrum                                                                                                                       | S11  |
| HSQC spectrum                                                                                                                                      | S12  |
| NOESY spectrum                                                                                                                                     | S12  |
| <i>(3S,3aR,5R,8aS)</i> -3,8-dimethyl-5-( <i>prop</i> -1-en-2-yl)-2,3,4,5,6,8a-hexahydroazulen-3a(1H)-ol ( <b>25</b> )                              |      |
| <sup>1</sup> H NMR spectrum                                                                                                                        | S13  |
| <sup>13</sup> C NMR spectrum                                                                                                                       | S13  |
| HSQC spectrum                                                                                                                                      | S14  |
| NOESY spectrum                                                                                                                                     | S14  |
| <i>(3S,3aR,5R)</i> -3,8-Dimethyl-5-( <i>prop</i> -1-en-2-yl)-1,2,3,3a,4,5,6,7-octahydroazulene [ <i>5-epi</i> - $\alpha$ -bulnesene] ( <b>26</b> ) |      |
| <sup>1</sup> H NMR spectrum                                                                                                                        | S15  |
| <sup>13</sup> C NMR spectrum                                                                                                                       | S15  |
| HSQC spectrum                                                                                                                                      | S16  |
| HMBC spectrum                                                                                                                                      | S16  |
| NOESY spectrum                                                                                                                                     | S17  |
| <i>(3S,3aR,5S)</i> -3,8-Dimethyl-5-( <i>prop</i> -1-en-2-yl)-1,2,3,3a,4,5,6,7-octahydroazulene [ $\alpha$ -bulnesene] ( <b>1</b> )                 |      |
| <sup>1</sup> H NMR spectrum                                                                                                                        | S18  |
| <sup>13</sup> C NMR spectrum                                                                                                                       | S18  |

**Procedures, characterisation data, and NMR spectra for the alkene regioisomers of compounds 9, 10, and 13 [S1, S2, and S3, respectively]**

|                                                                                               |     |
|-----------------------------------------------------------------------------------------------|-----|
| <i>Procedures</i>                                                                             | S19 |
| <i>(7RS,4R)-7-Methyl-4-(prop-1-en-2-yl)cyclohept-1-en-1-yl trifluoromethanesulfonate (S1)</i> |     |
| <sup>1</sup> H NMR spectrum                                                                   | S21 |
| <sup>13</sup> C NMR spectrum                                                                  | S21 |
| <i>(7RS,4R)-1-(But-3-yn-1-yl)-7-methyl-4-(prop-1-en-2-yl)cyclohept-1-ene (S2)</i>             |     |
| <sup>1</sup> H NMR spectrum                                                                   | S22 |
| <sup>13</sup> C NMR spectrum                                                                  | S22 |
| <i>(7RS,4R)-1-(3-Iodobut-3-en-1-yl)-7-methyl-4-(prop-1-en-2-yl)cyclohept-1-ene (S3)</i>       |     |
| <sup>1</sup> H NMR spectrum                                                                   | S23 |
| <sup>13</sup> C NMR spectrum                                                                  | S23 |

**Optimisation of the butenylation reaction leading to ketone 18**

|                                                                  |     |
|------------------------------------------------------------------|-----|
| <i>Table S1. Direct butenylation of enone 14</i>                 | S24 |
| <i>Table S2. Direct butenylation of enone 13</i>                 | S24 |
| <i>Table S3. Alkylation of enone 14 with 1,4-dihalobut-2-ene</i> | S24 |
| <i>Table S4. Reductive rearrangement of ketone 15</i>            | S25 |

$^1\text{H}$  NMR (400 MHz,  $\text{CDCl}_3$ ) [ $dr \sim 3:1$ ]

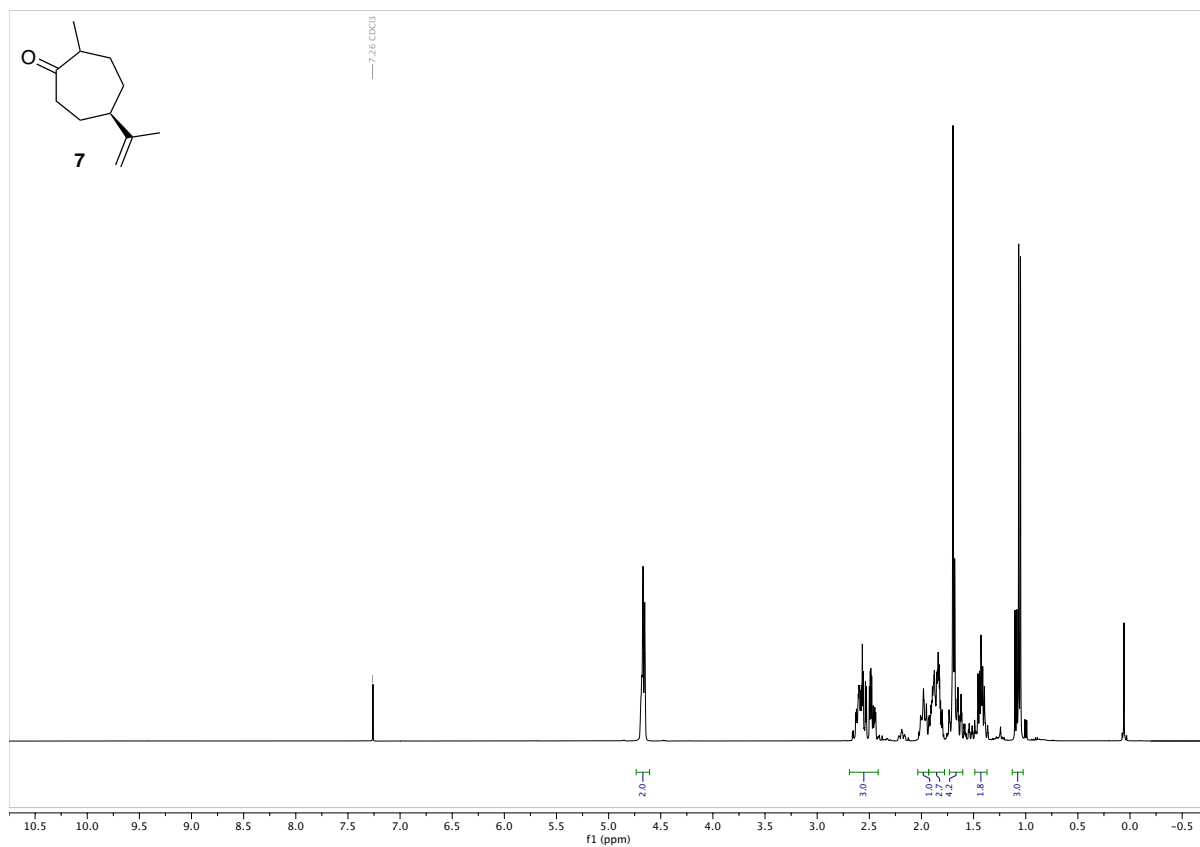

$^{13}\text{C}$  NMR (101 MHz,  $\text{CDCl}_3$ ) [ $dr \sim 3:1$ ]

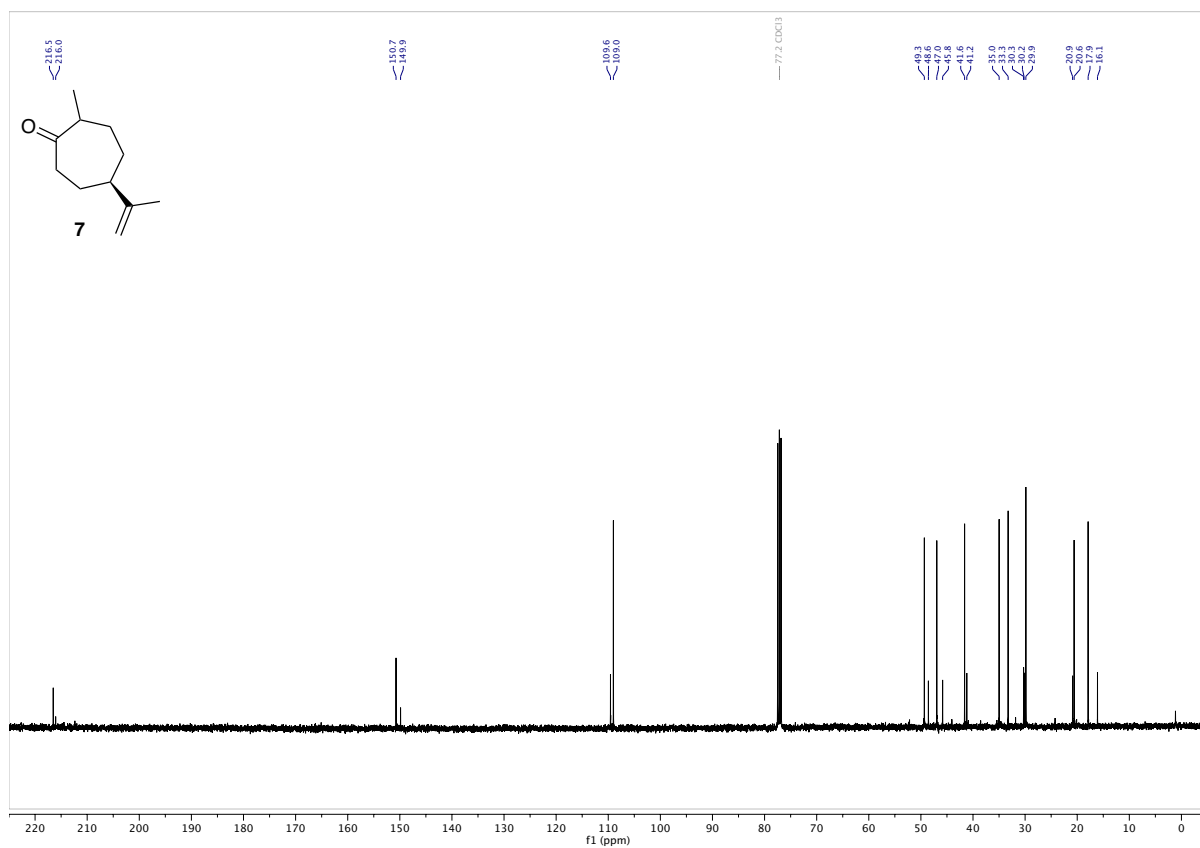

$^1\text{H}$  NMR (400 MHz,  $\text{CDCl}_3$ )

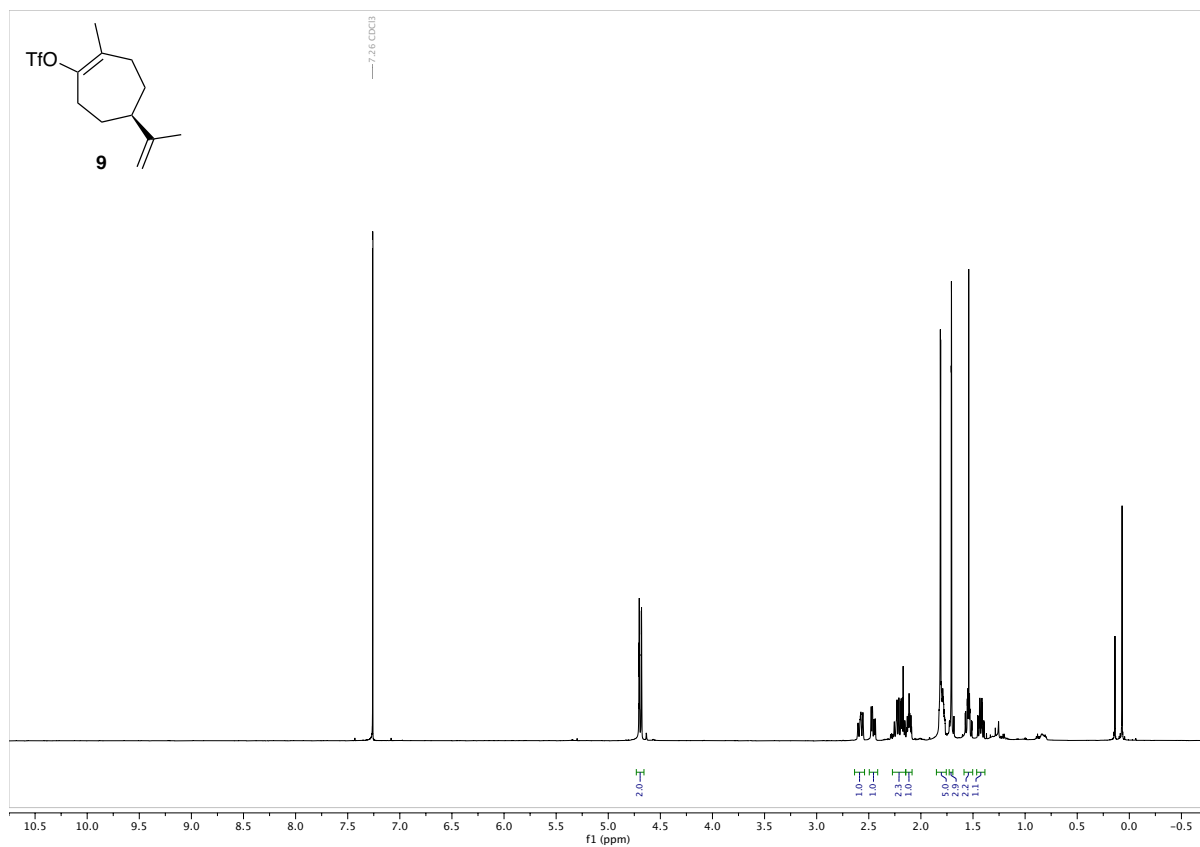

$^{13}\text{C}$  NMR (101 MHz,  $\text{CDCl}_3$ )

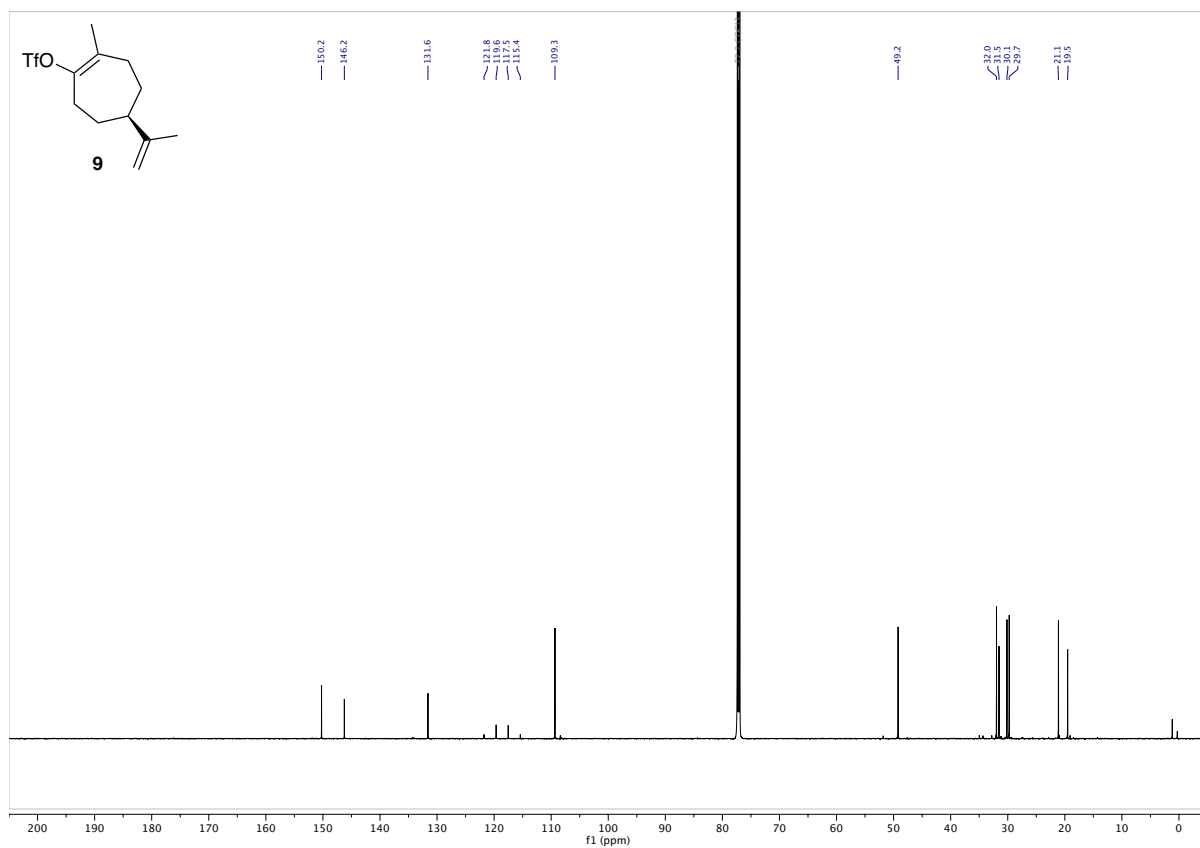

$^1\text{H}$  NMR (400 MHz,  $\text{CDCl}_3$ )

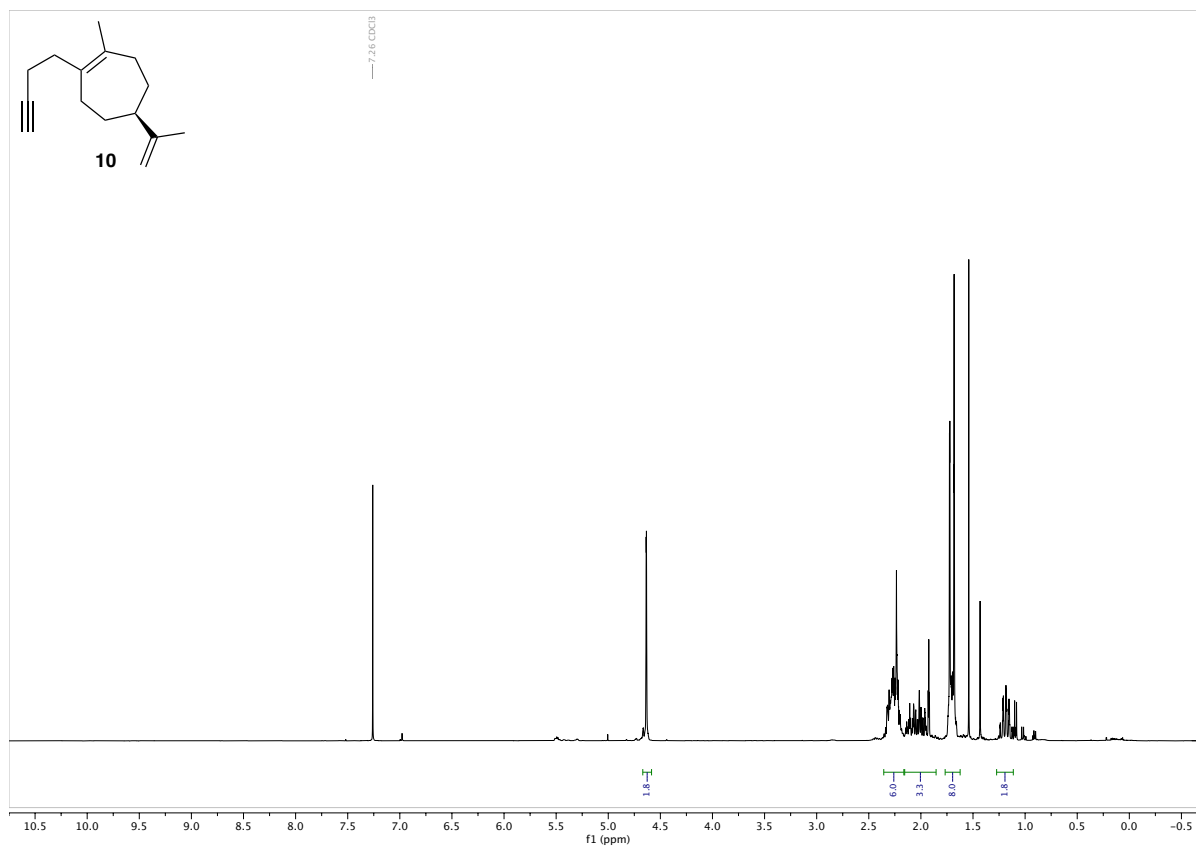

$^{13}\text{C}$  NMR (101 MHz,  $\text{CDCl}_3$ )

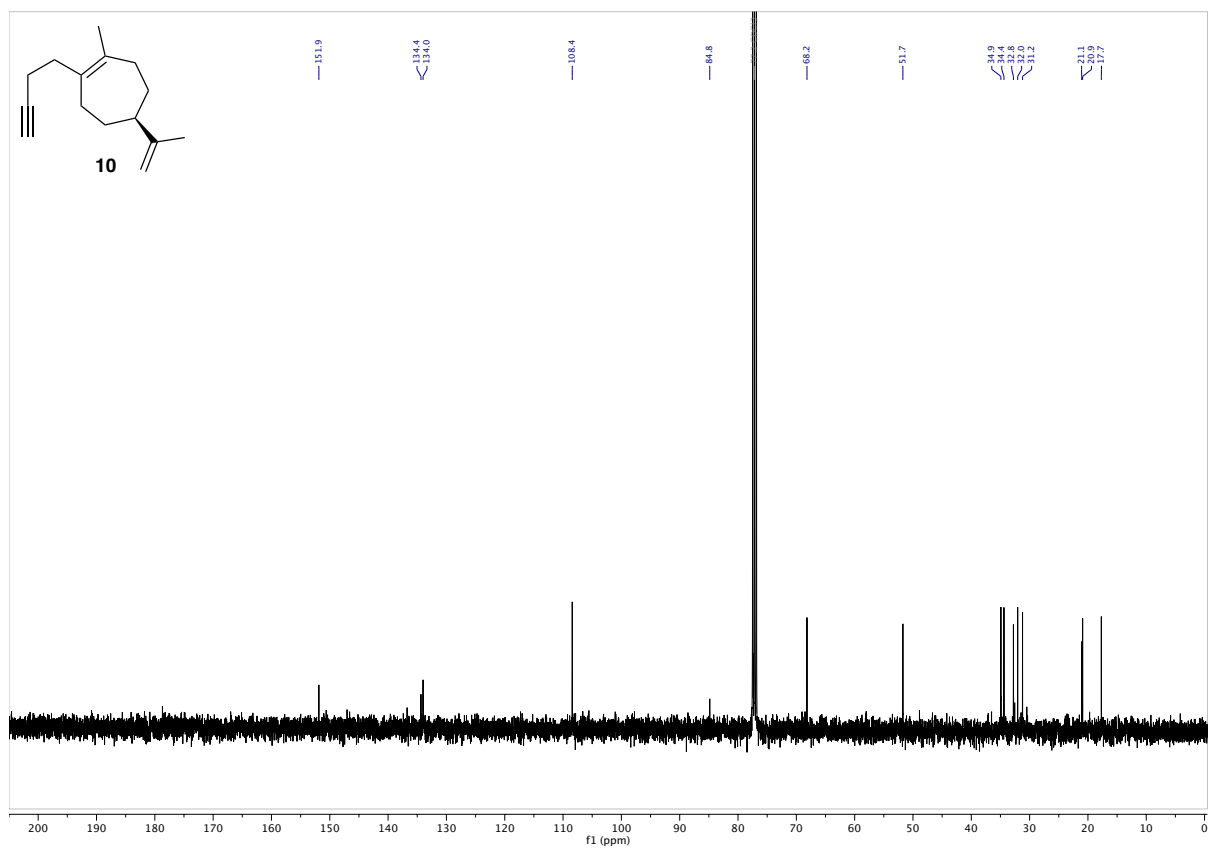

$^1\text{H}$  NMR (400 MHz,  $\text{CDCl}_3$ )

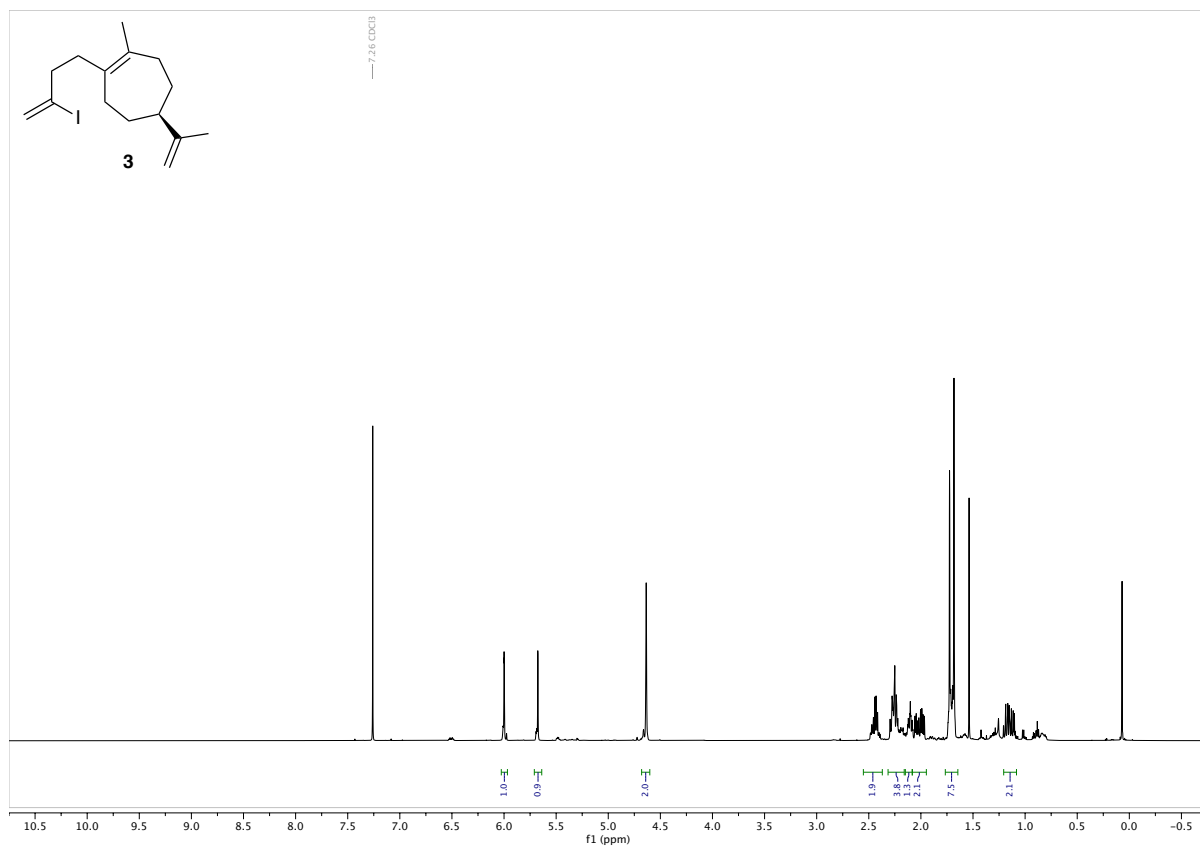

$^{13}\text{C}$  NMR (101 MHz,  $\text{CDCl}_3$ )

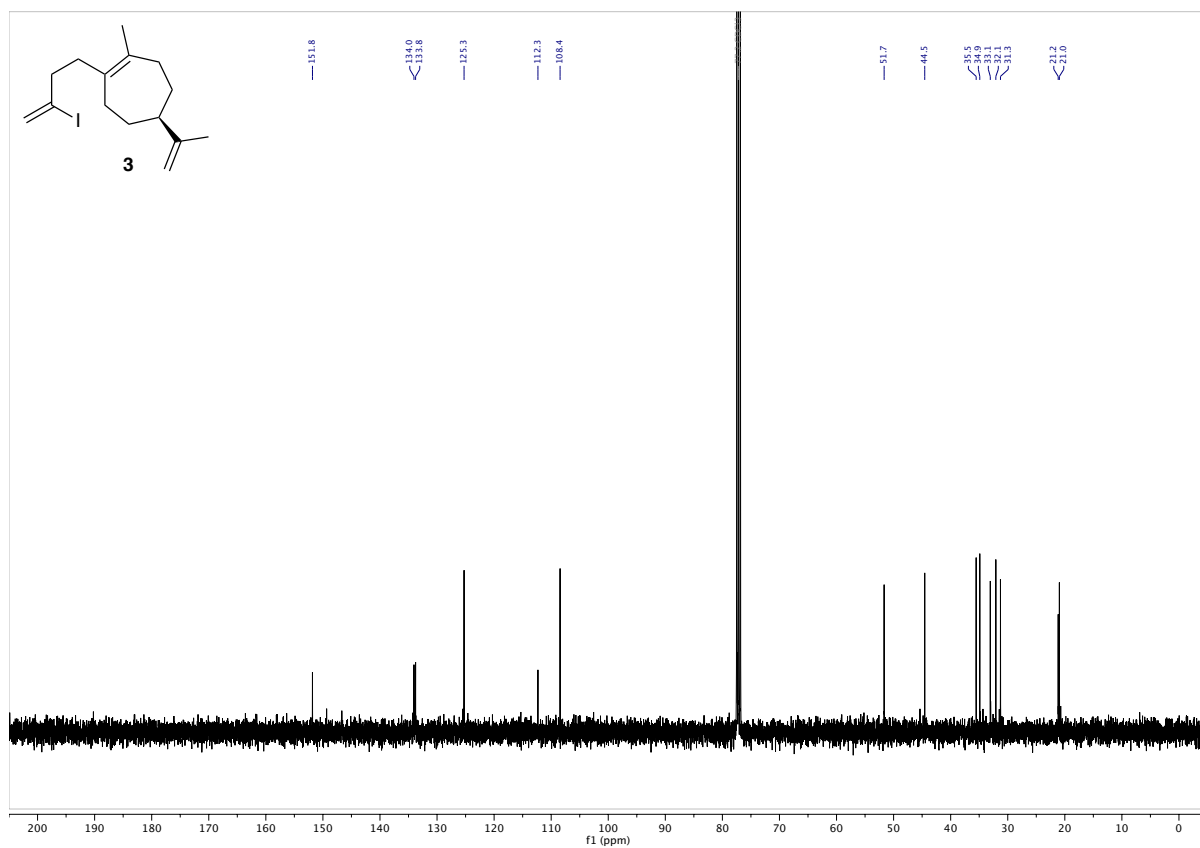

$^1\text{H}$  NMR (400 MHz,  $\text{CDCl}_3$ ) [ $dr \sim 1:1$ ]

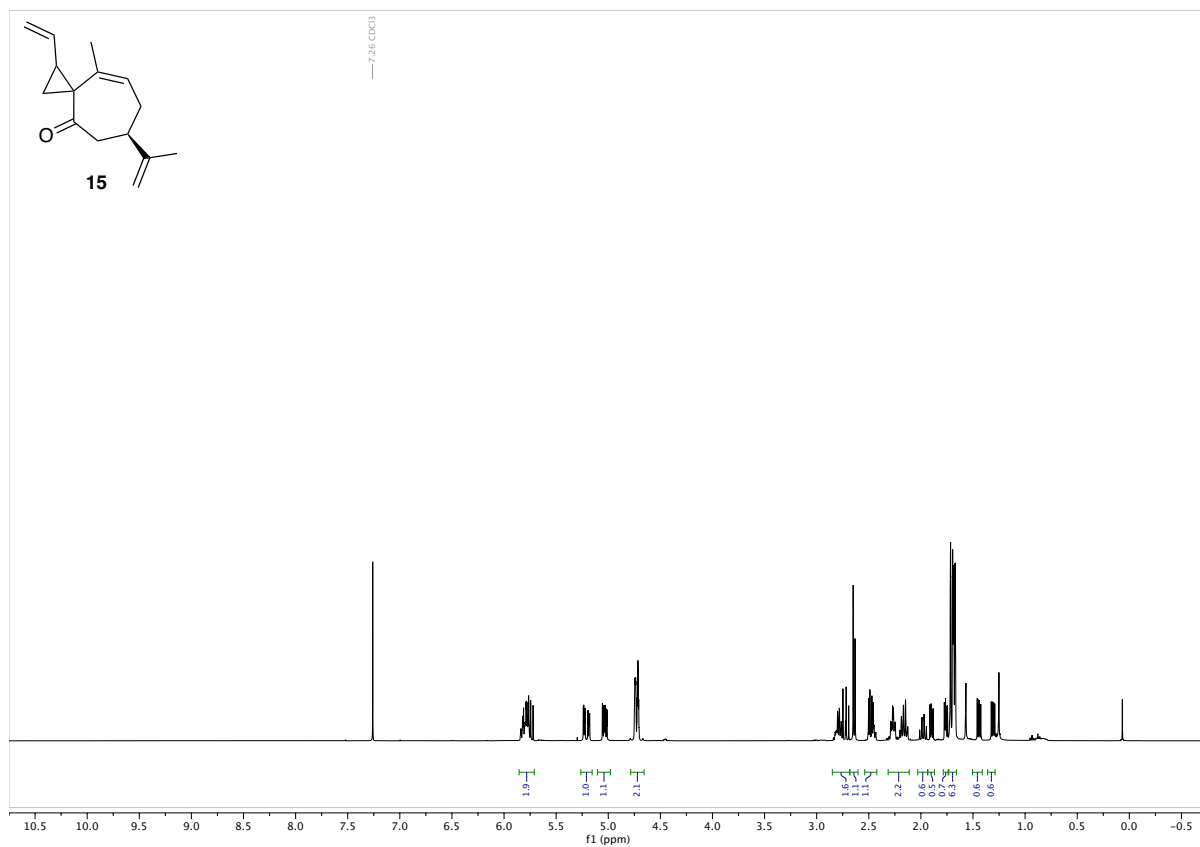

$^{13}\text{C}$  NMR (101 MHz,  $\text{CDCl}_3$ ) [ $dr \sim 1:1$ ]

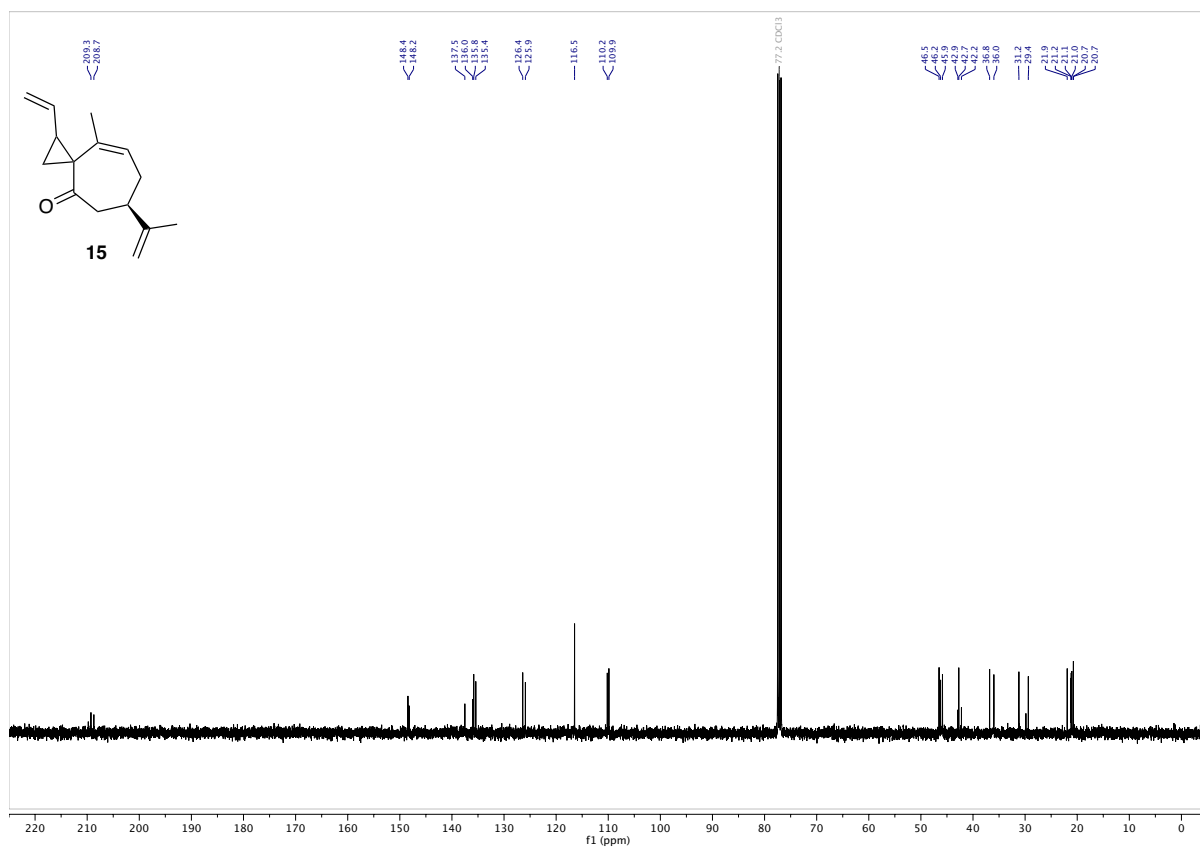

$^1\text{H}$  NMR (400 MHz,  $\text{CDCl}_3$ ) [ $dr \sim 2:1$ ]

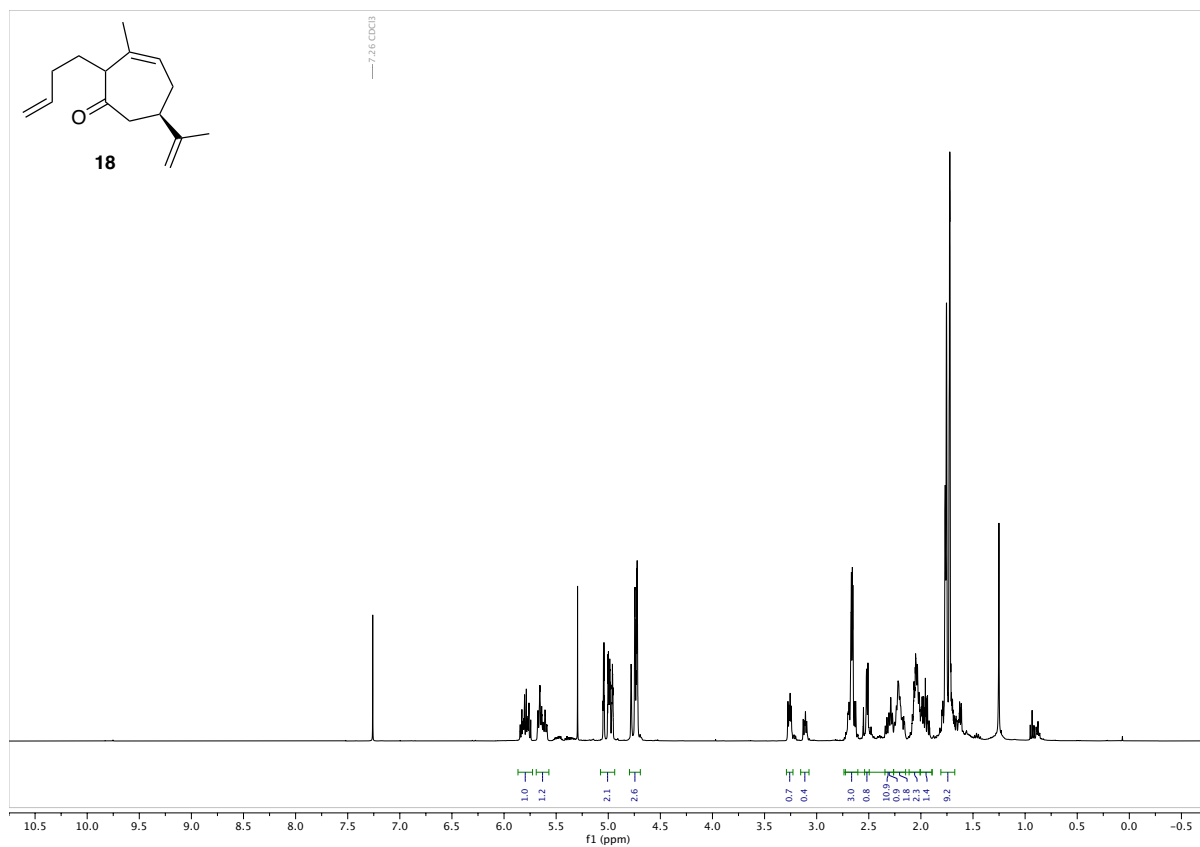

$^{13}\text{C}$  NMR (101 MHz,  $\text{CDCl}_3$ ) [ $dr \sim 2:1$ ]

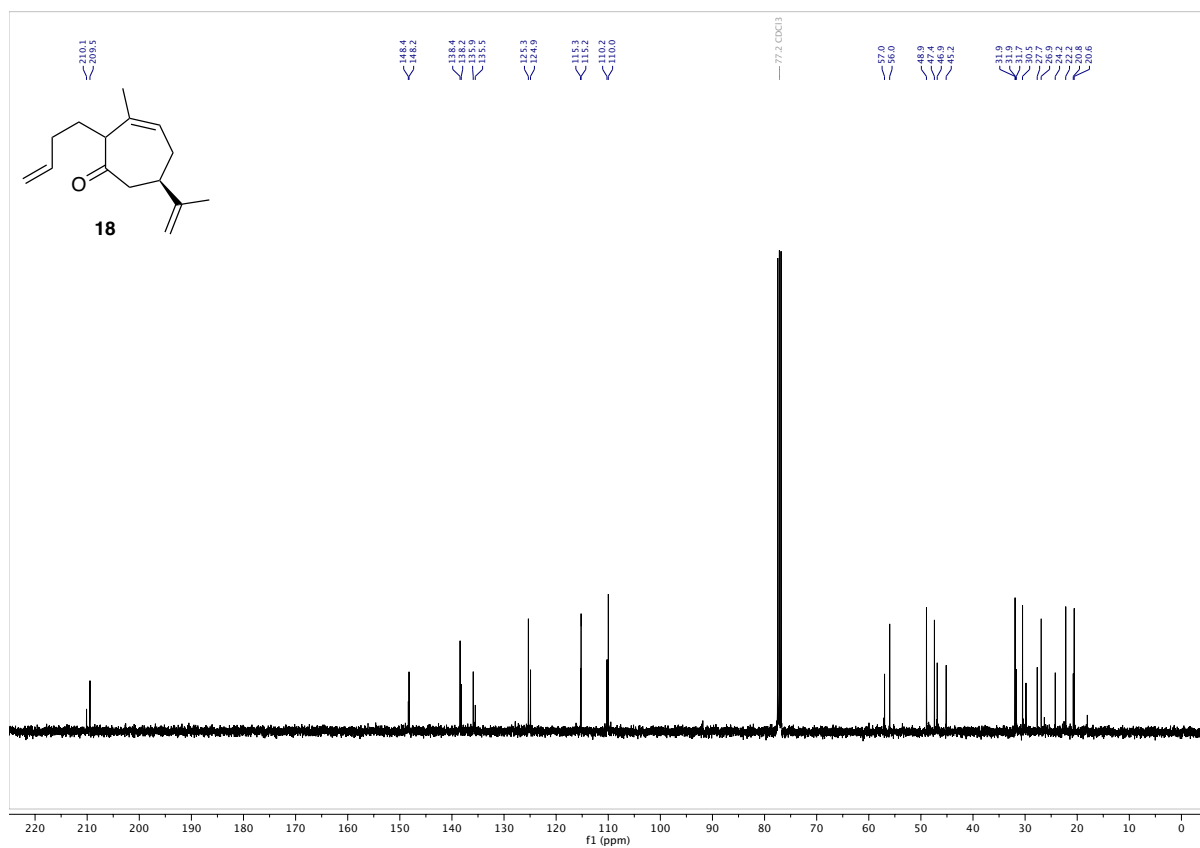

$^1\text{H}$  NMR (400 MHz,  $\text{CDCl}_3$ )

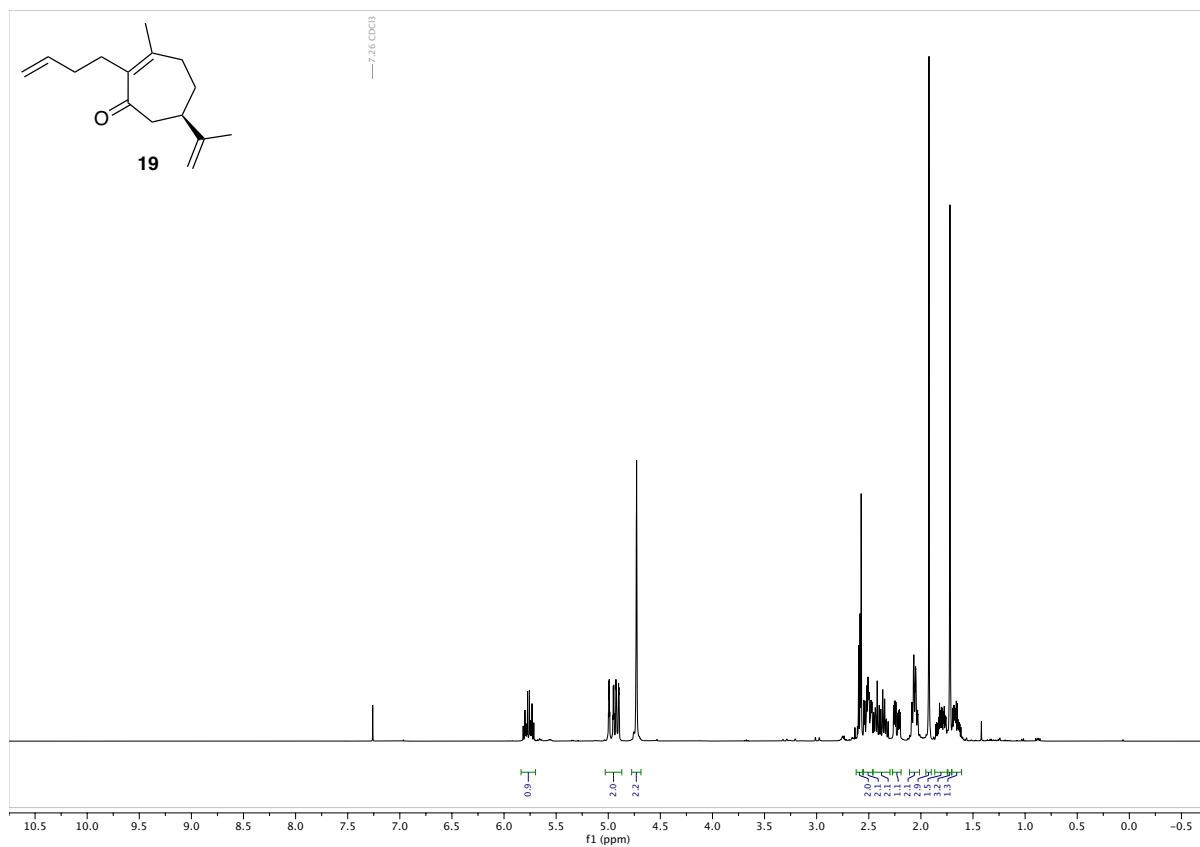

$^{13}\text{C}$  NMR (101 MHz,  $\text{CDCl}_3$ )

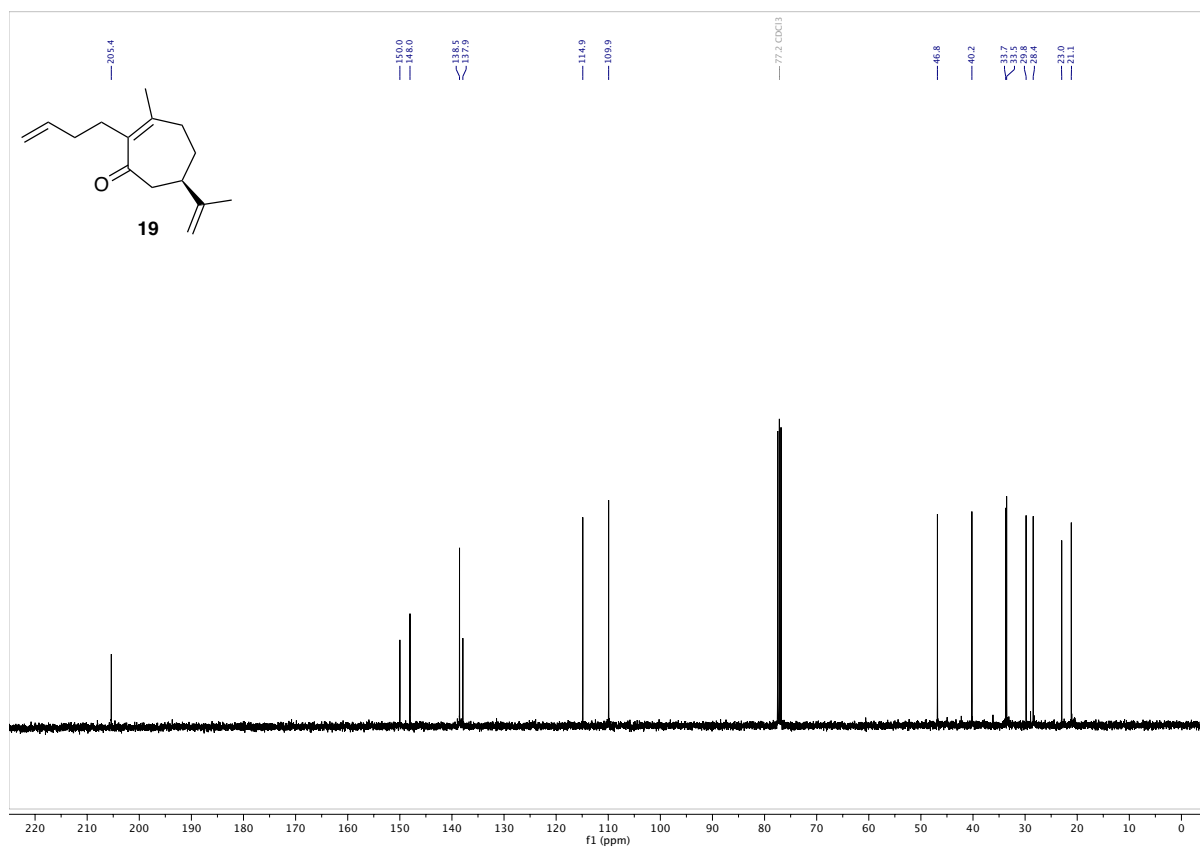

$^1\text{H}$  NMR (600 MHz,  $\text{C}_6\text{D}_6$ ) [ $dr \sim 5:1$ ]

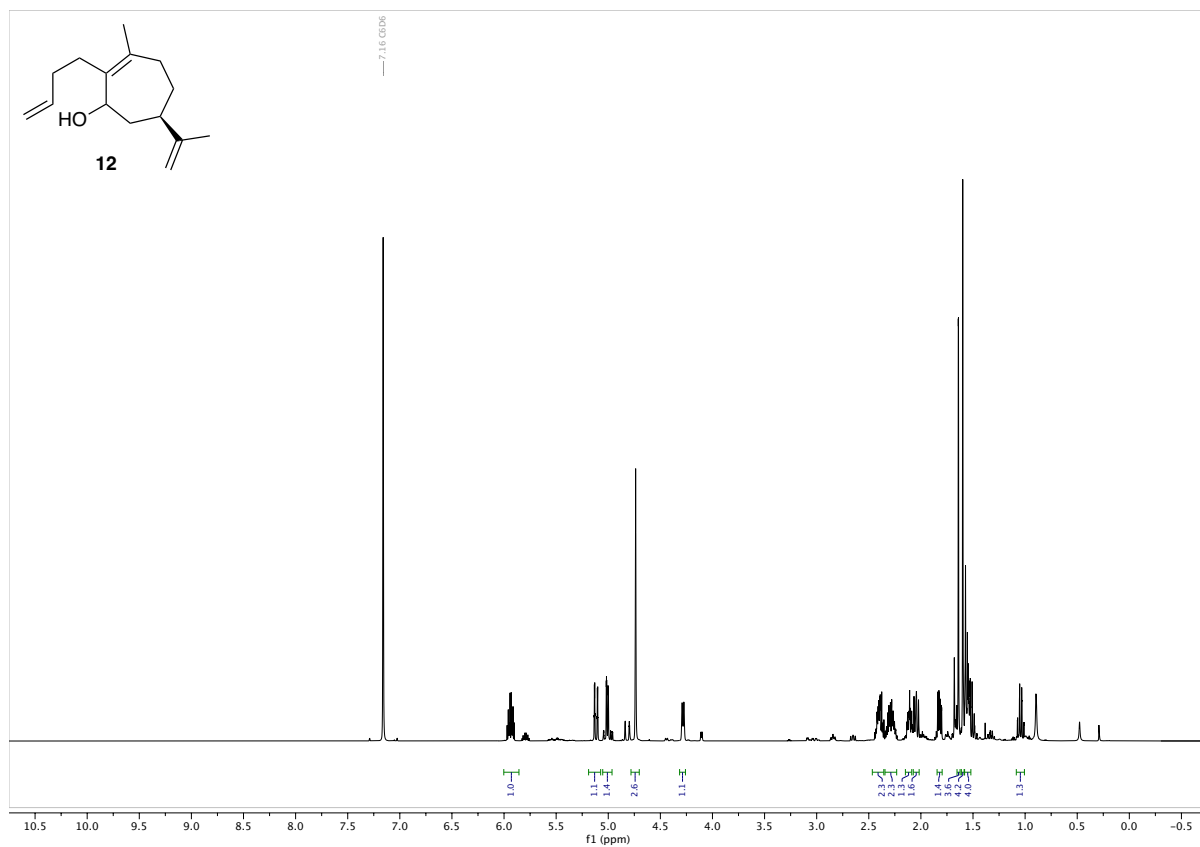

$^{13}\text{C}$  NMR (151 MHz,  $\text{C}_6\text{D}_6$ ) [ $dr \sim 5:1$ ]

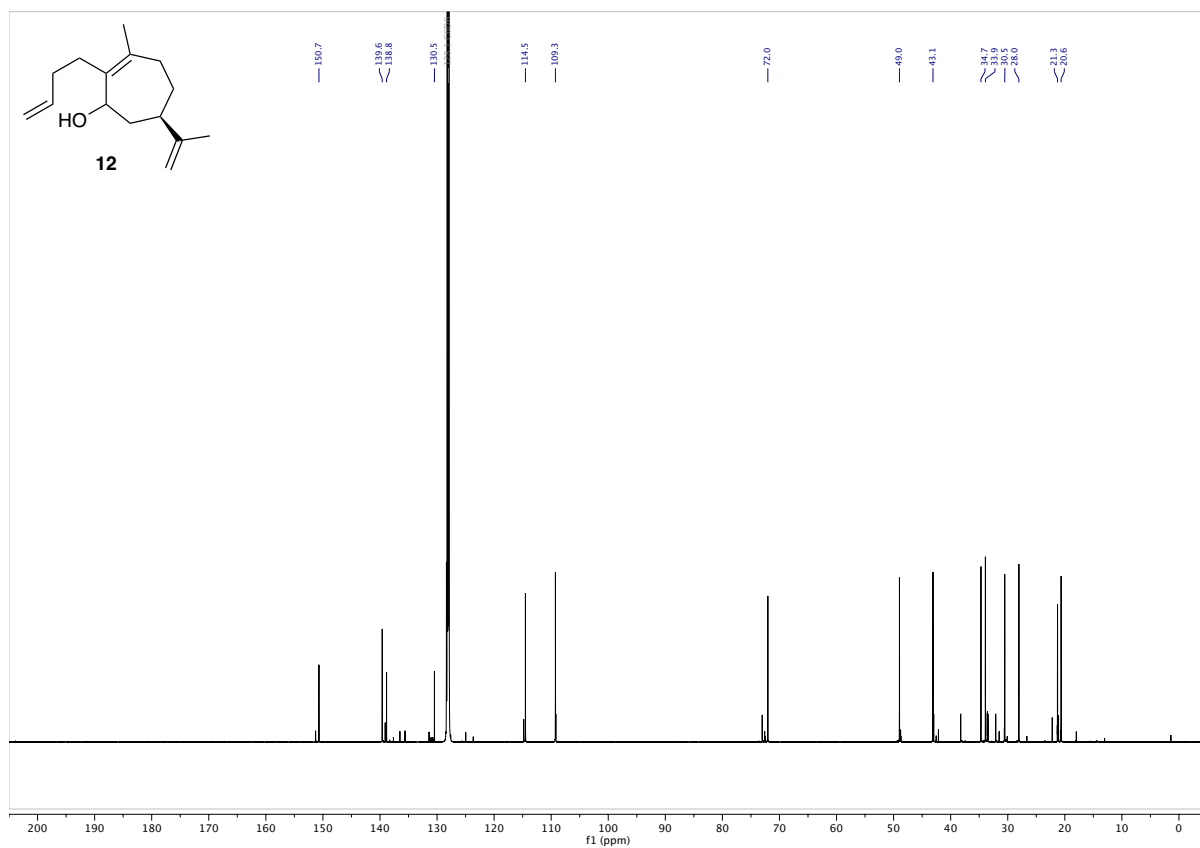

$^1\text{H}$  NMR (600 MHz, acetone- $d_6$ )

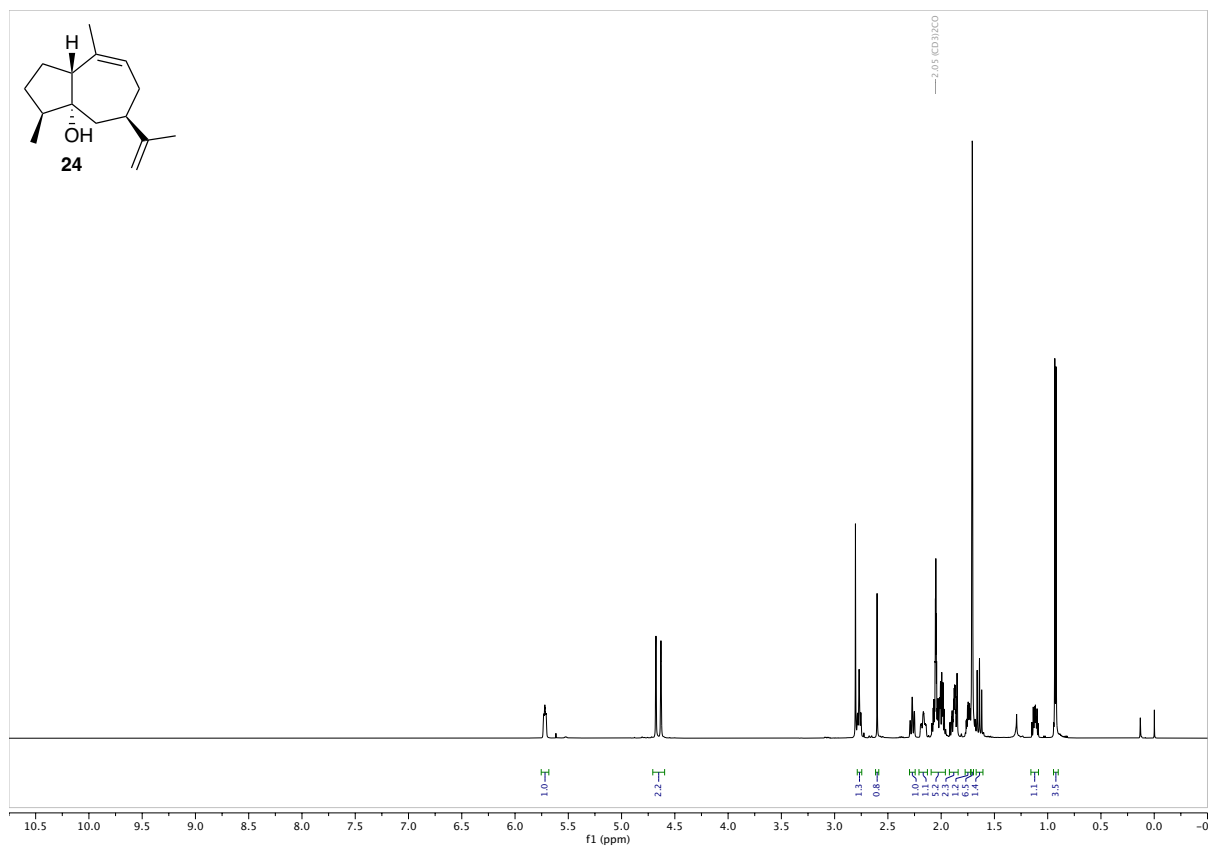

$^{13}\text{C}$  NMR (151 MHz, acetone- $d_6$ )

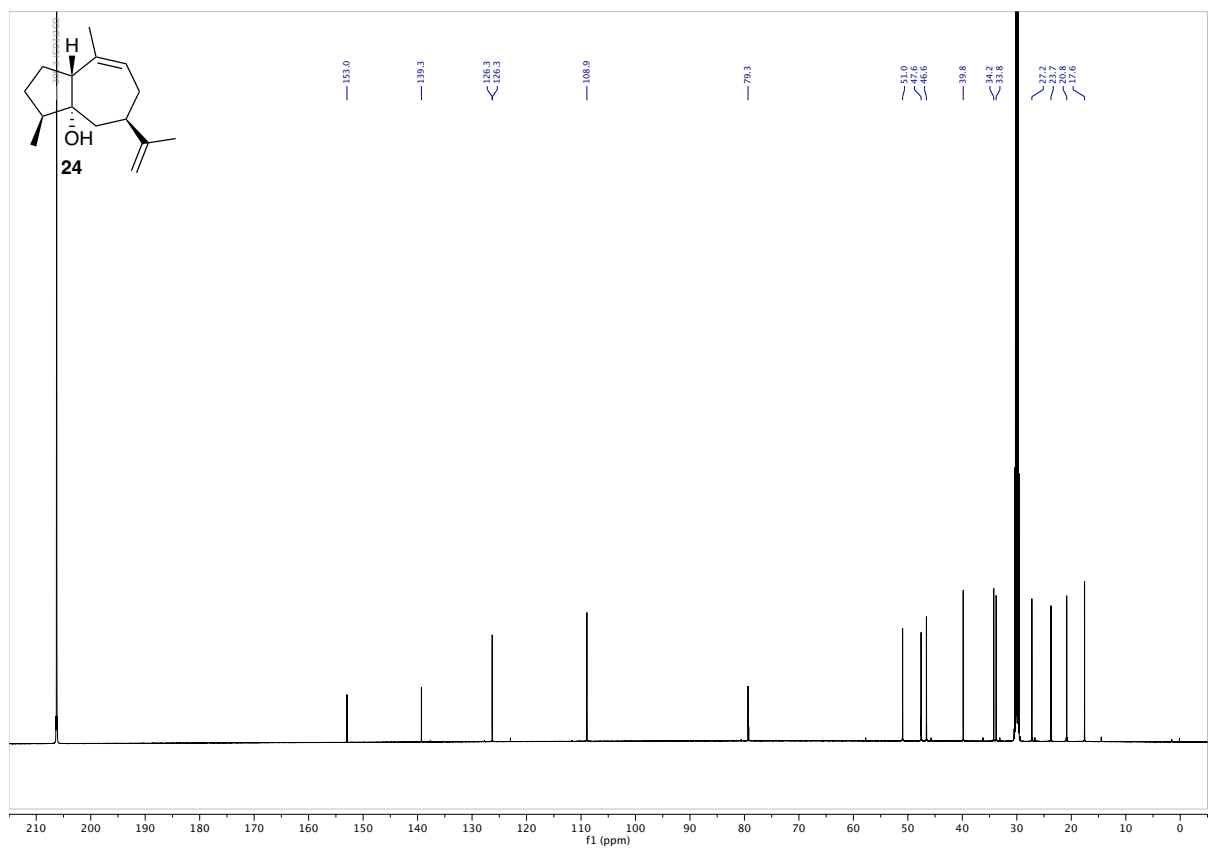

HSQC (acetone- $d_6$ )

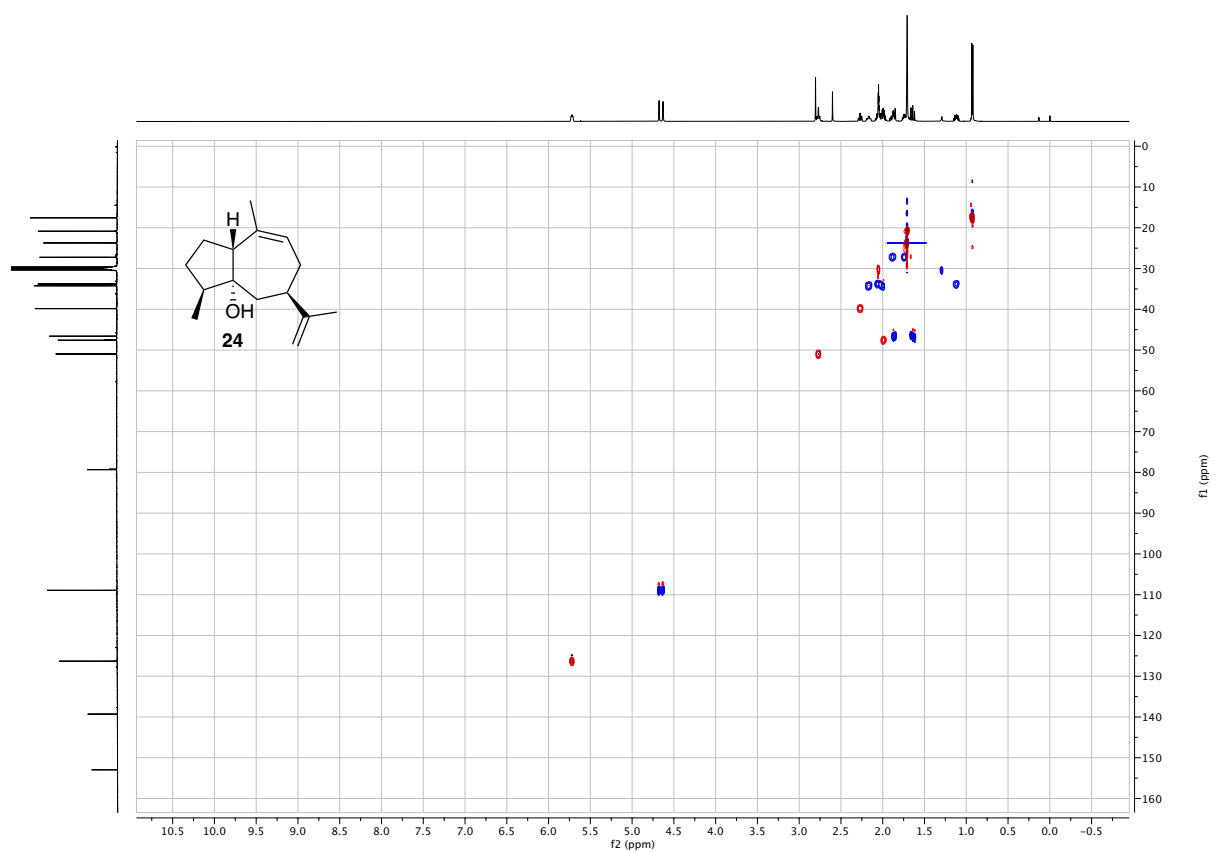

NOESY (acetone- $d_6$ )

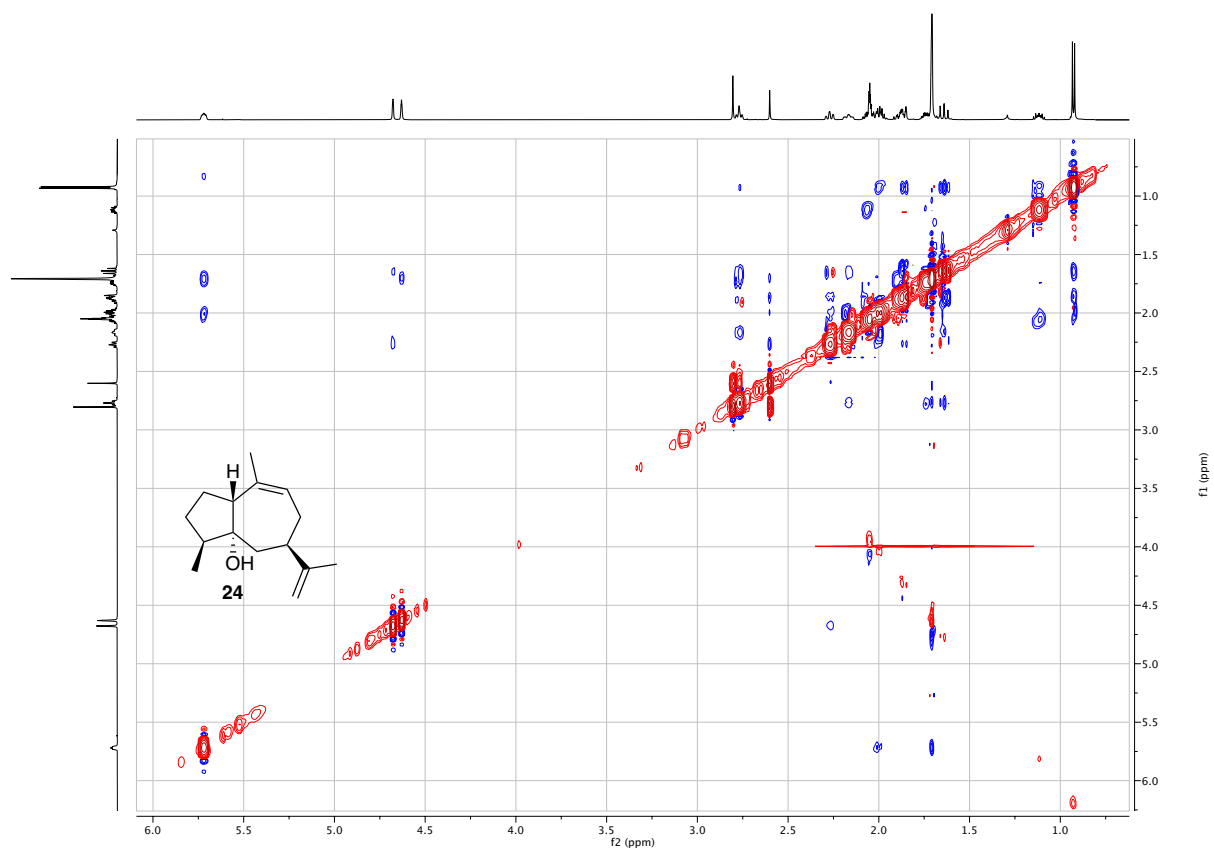

$^1\text{H}$  NMR (600 MHz, acetone- $d_6$ )

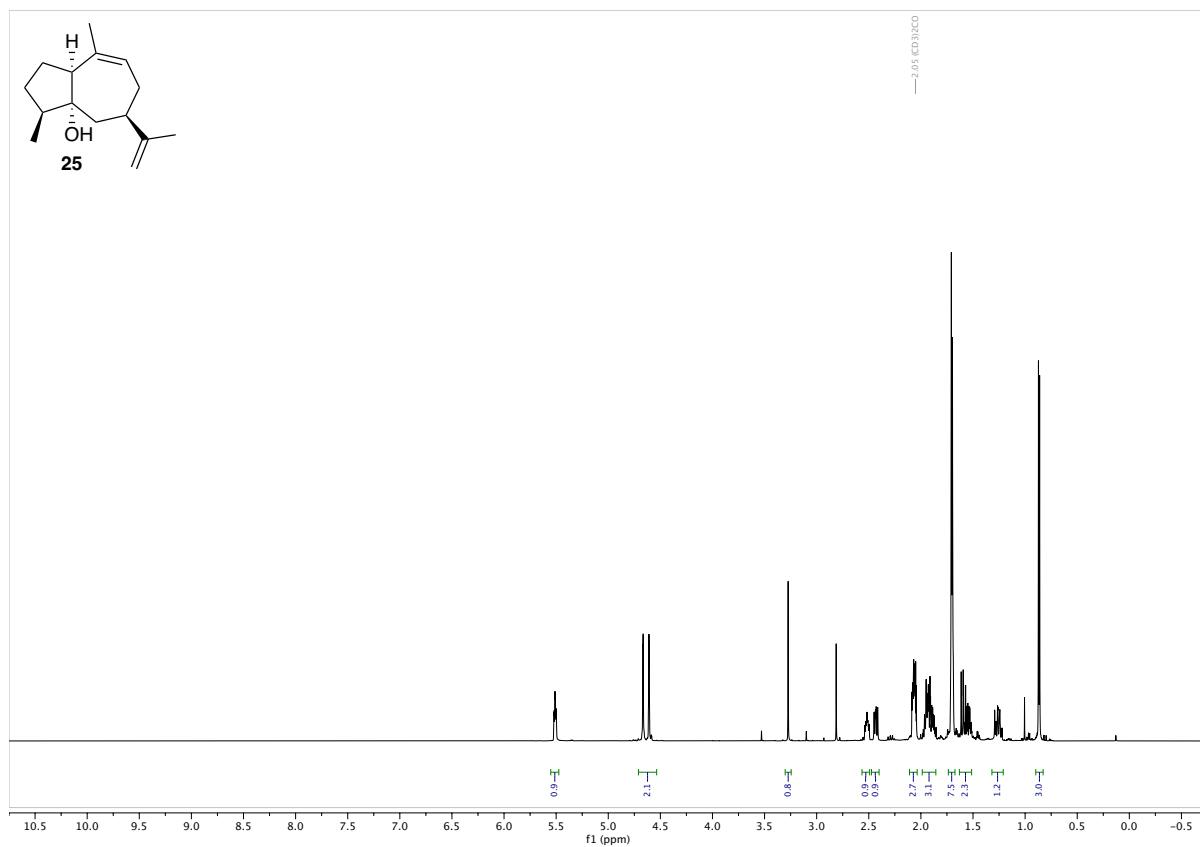

$^{13}\text{C}$  NMR (151 MHz, acetone- $d_6$ )

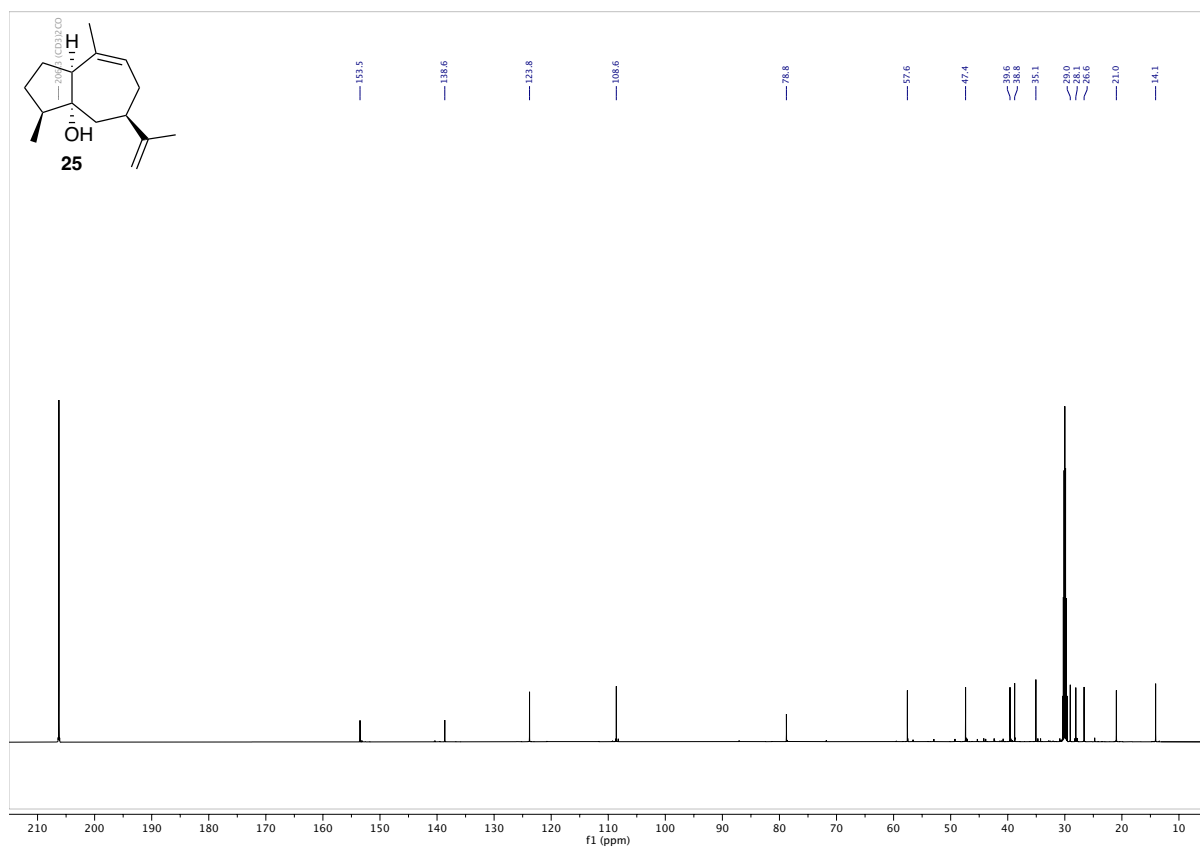

HSQC (acetone- $d_6$ )

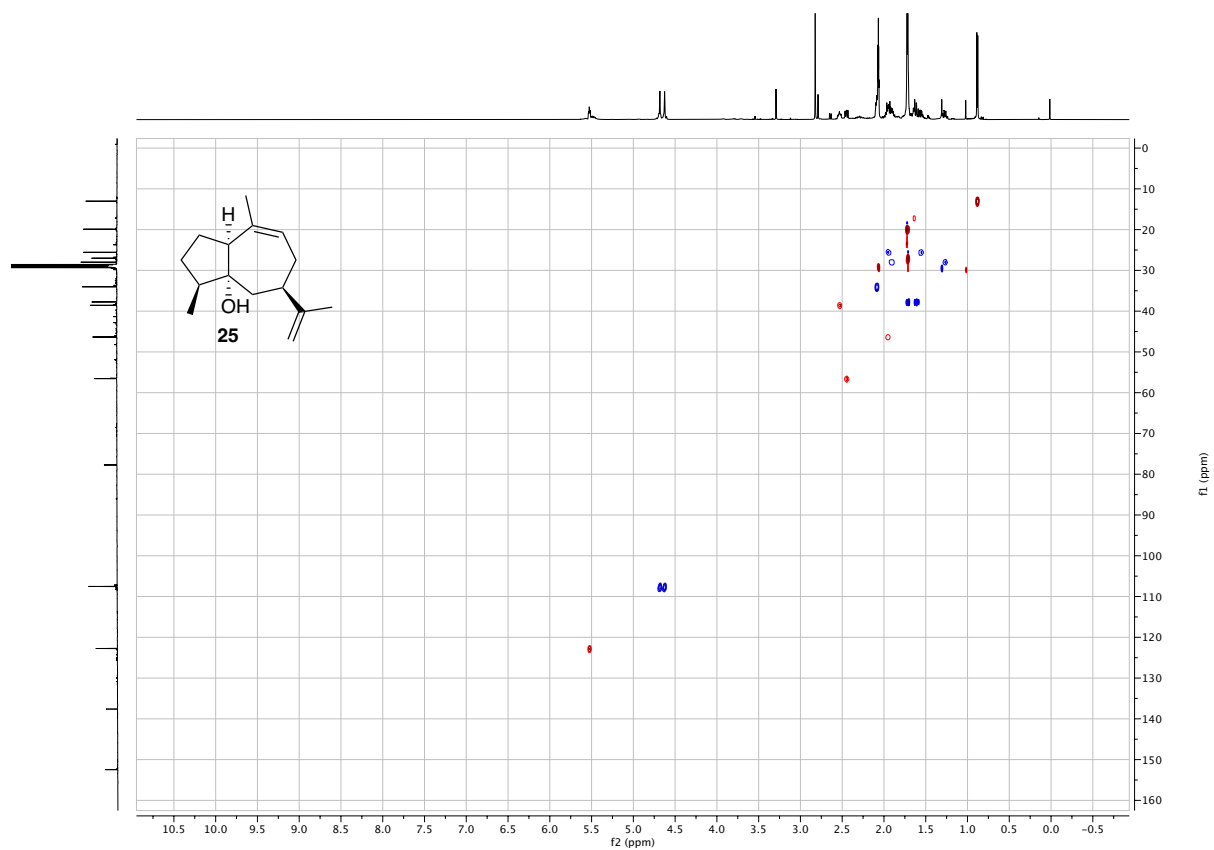

NOESY (acetone- $d_6$ )

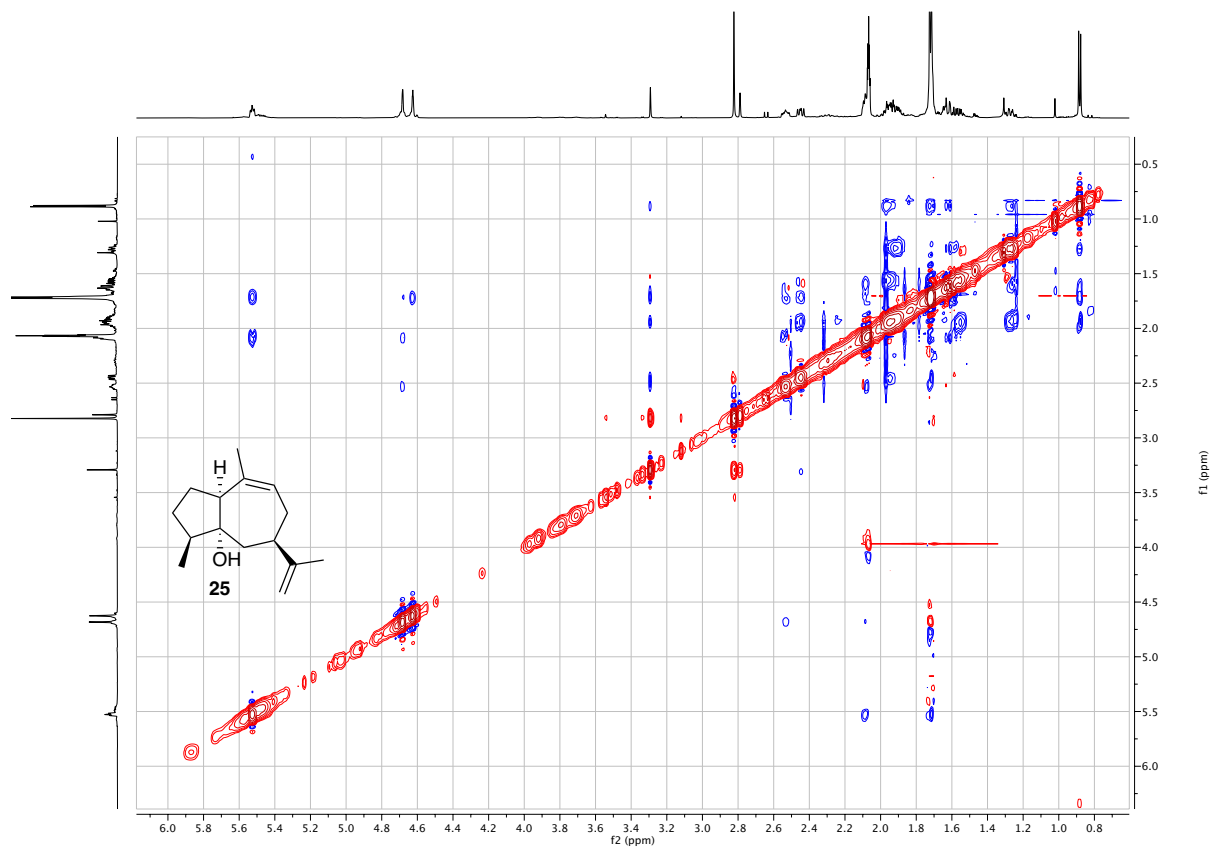

<sup>1</sup>H NMR (600 MHz, CDCl<sub>3</sub>)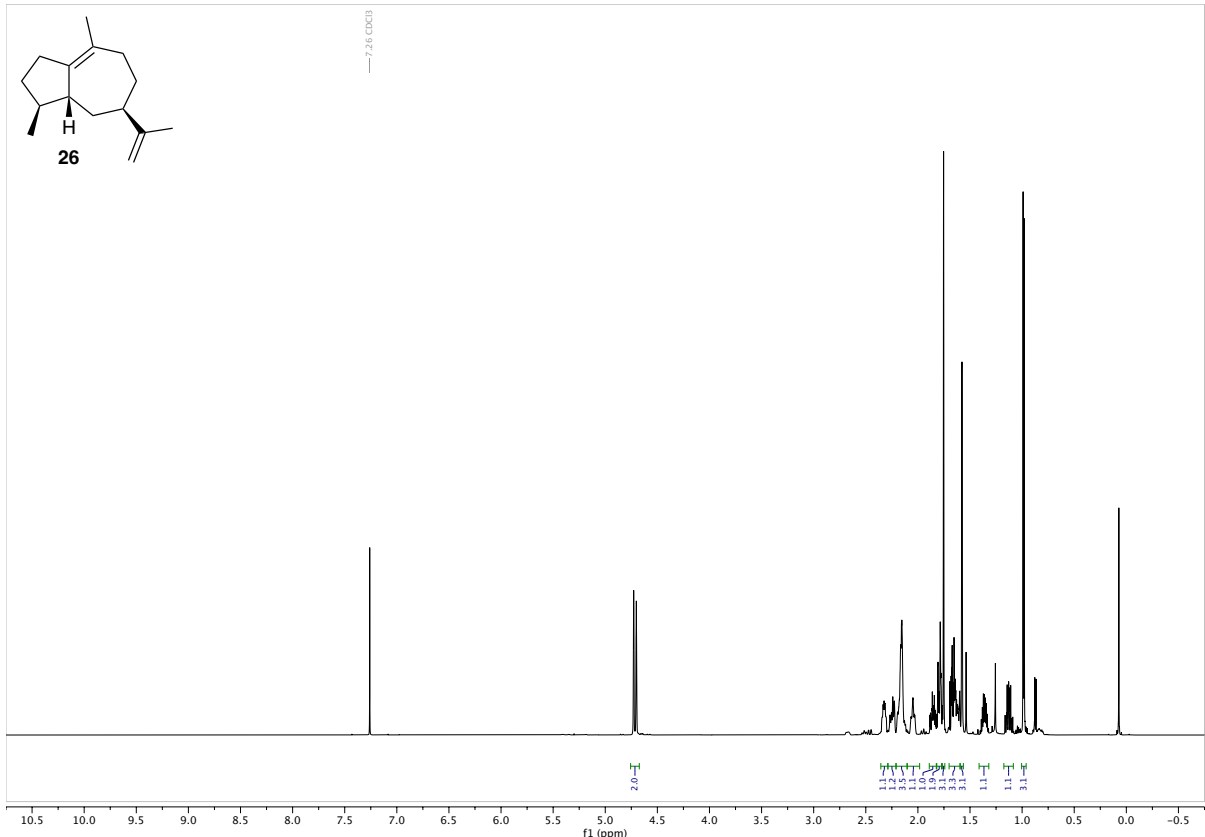 $^{13}\text{C}$  NMR (151 MHz,  $\text{CDCl}_3$ )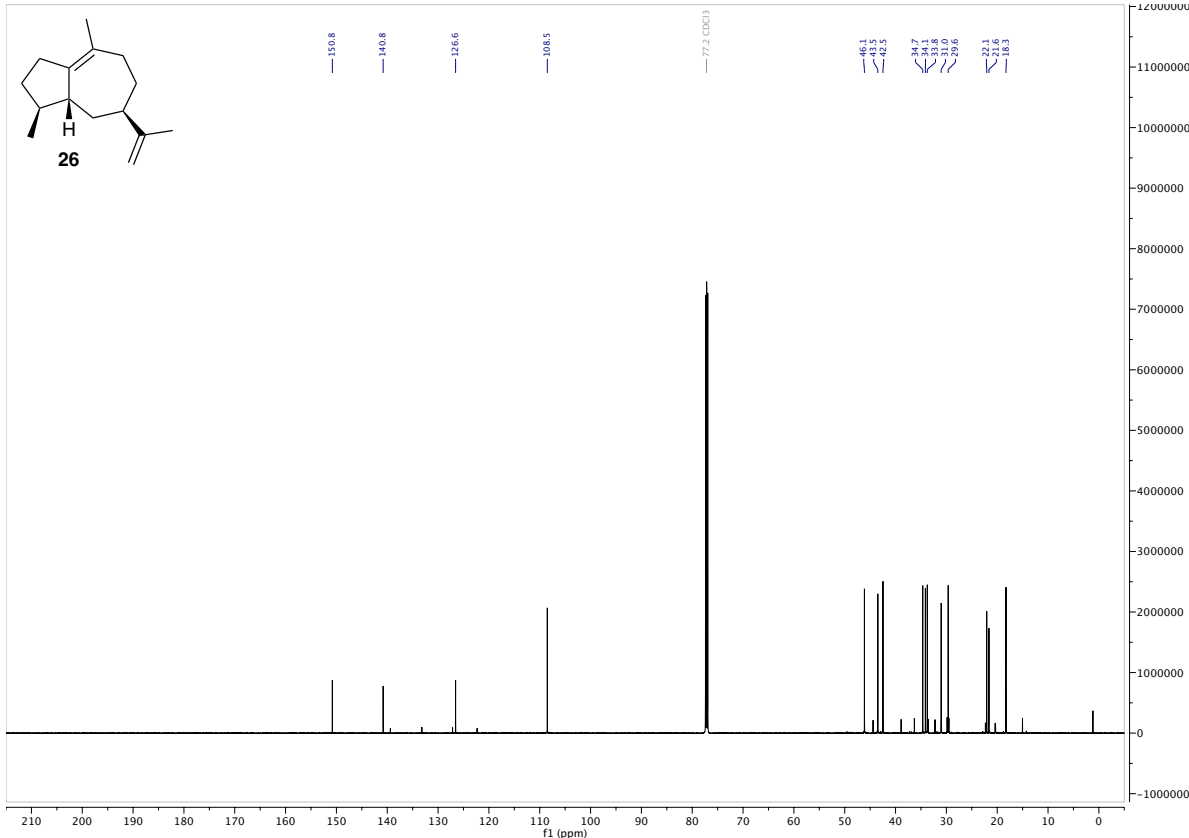

HSQC (CDCl<sub>3</sub>)

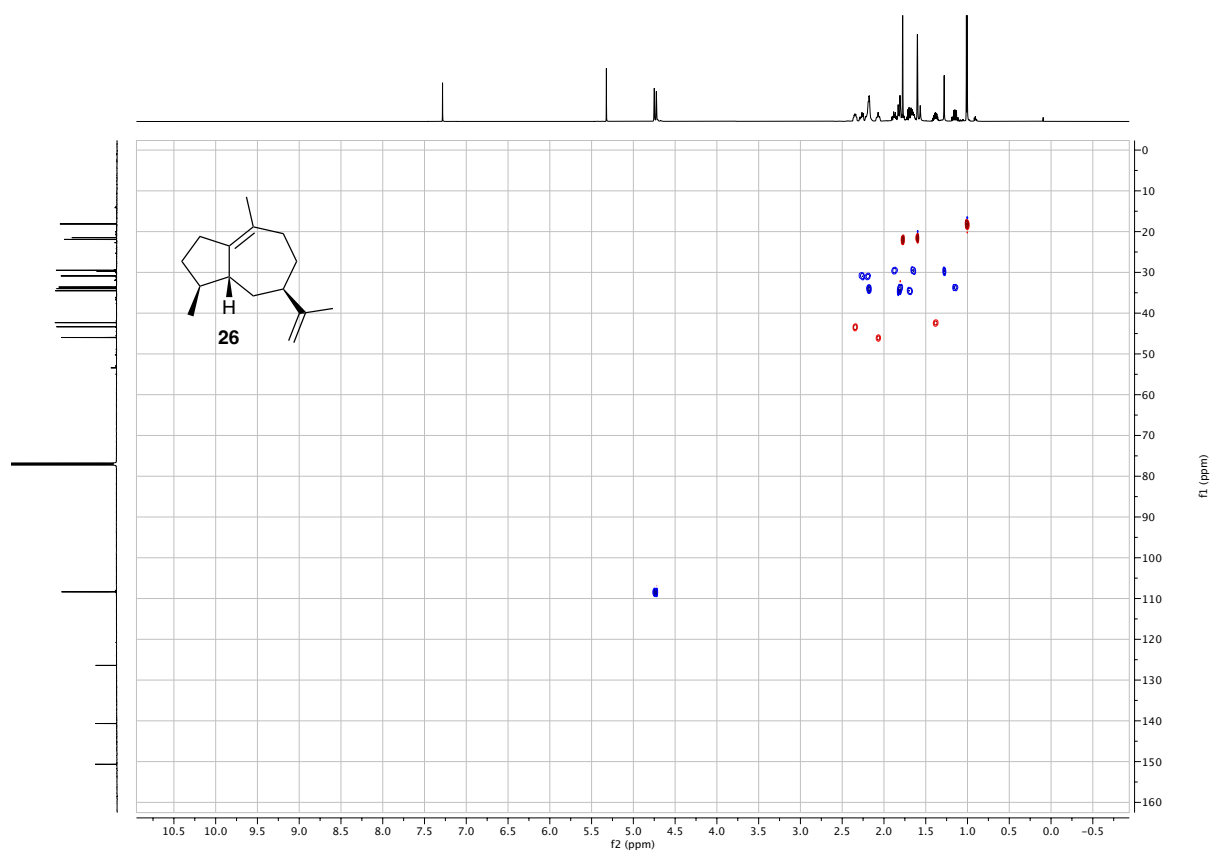

HMBC (CDCl<sub>3</sub>)

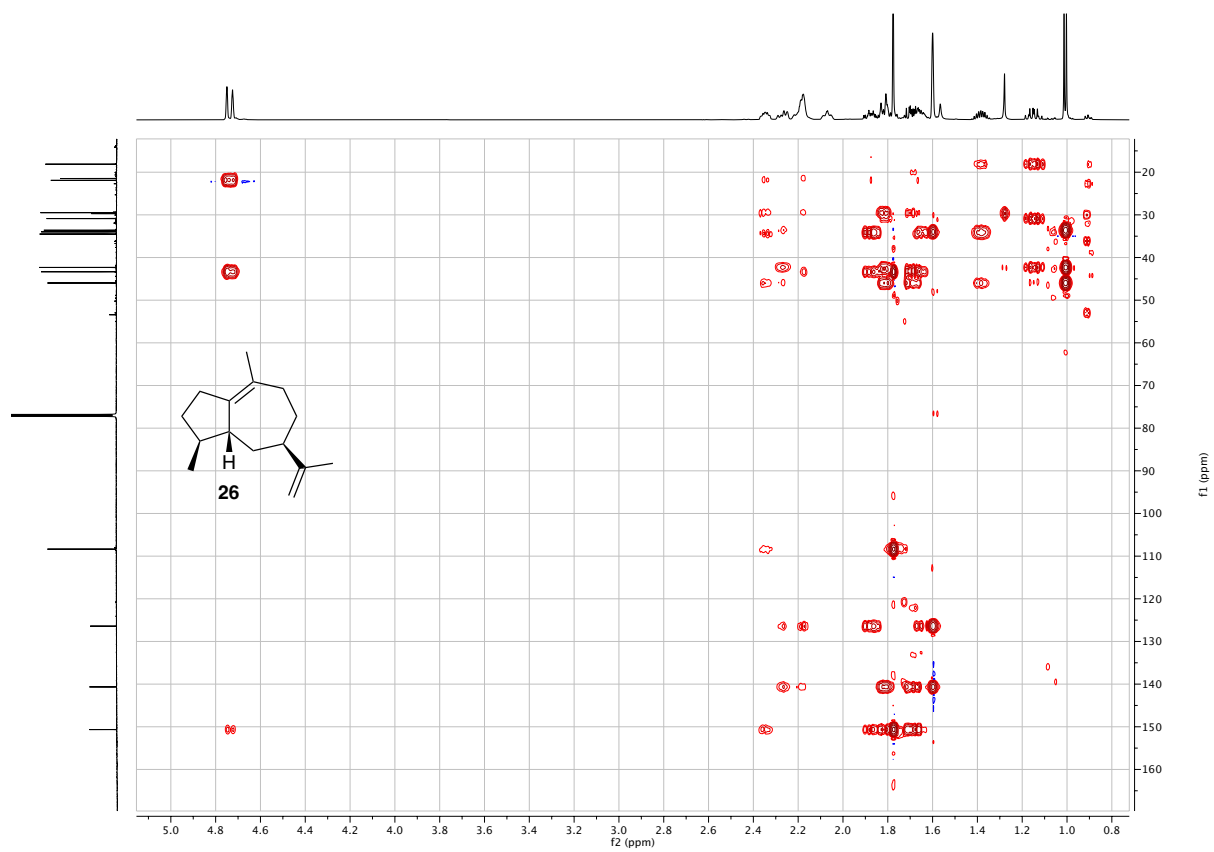

NOESY (CDCl<sub>3</sub>)

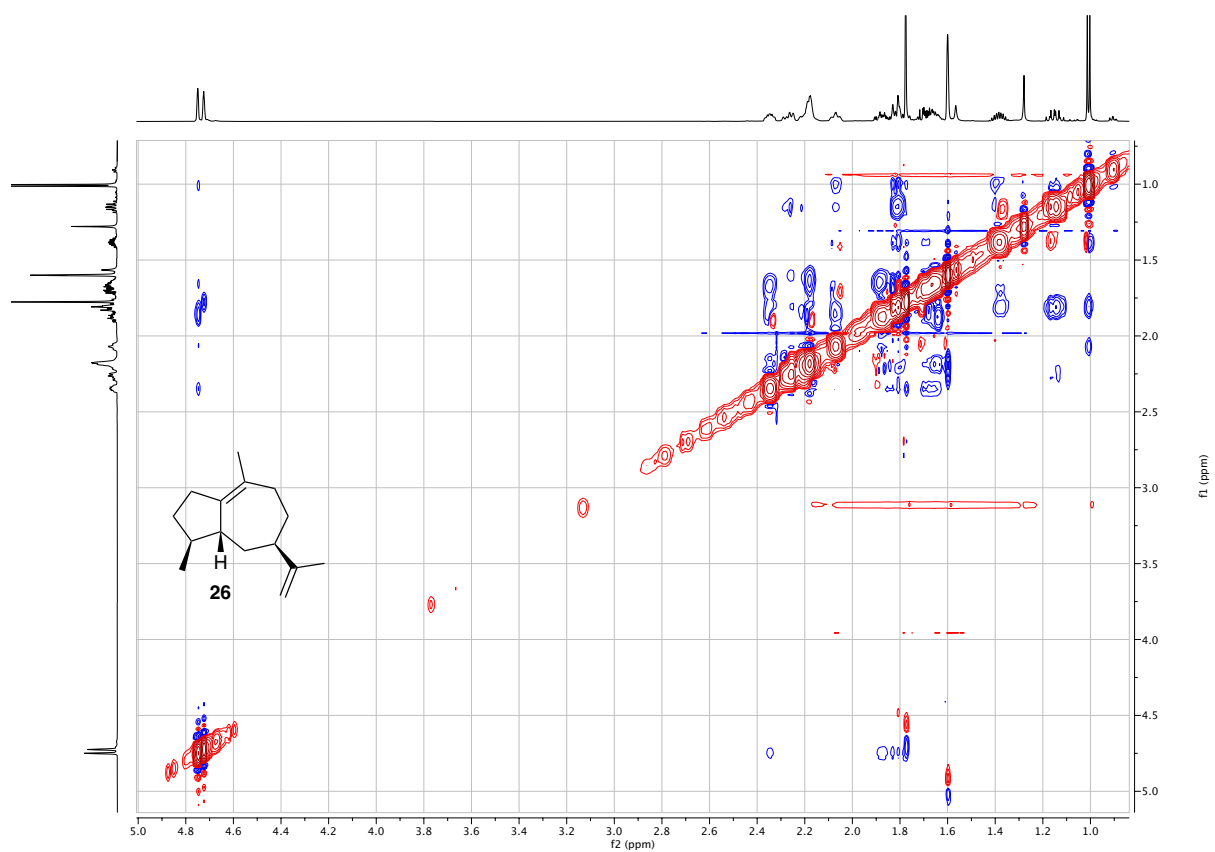

$^1\text{H}$  NMR (600 MHz,  $\text{CDCl}_3$ )

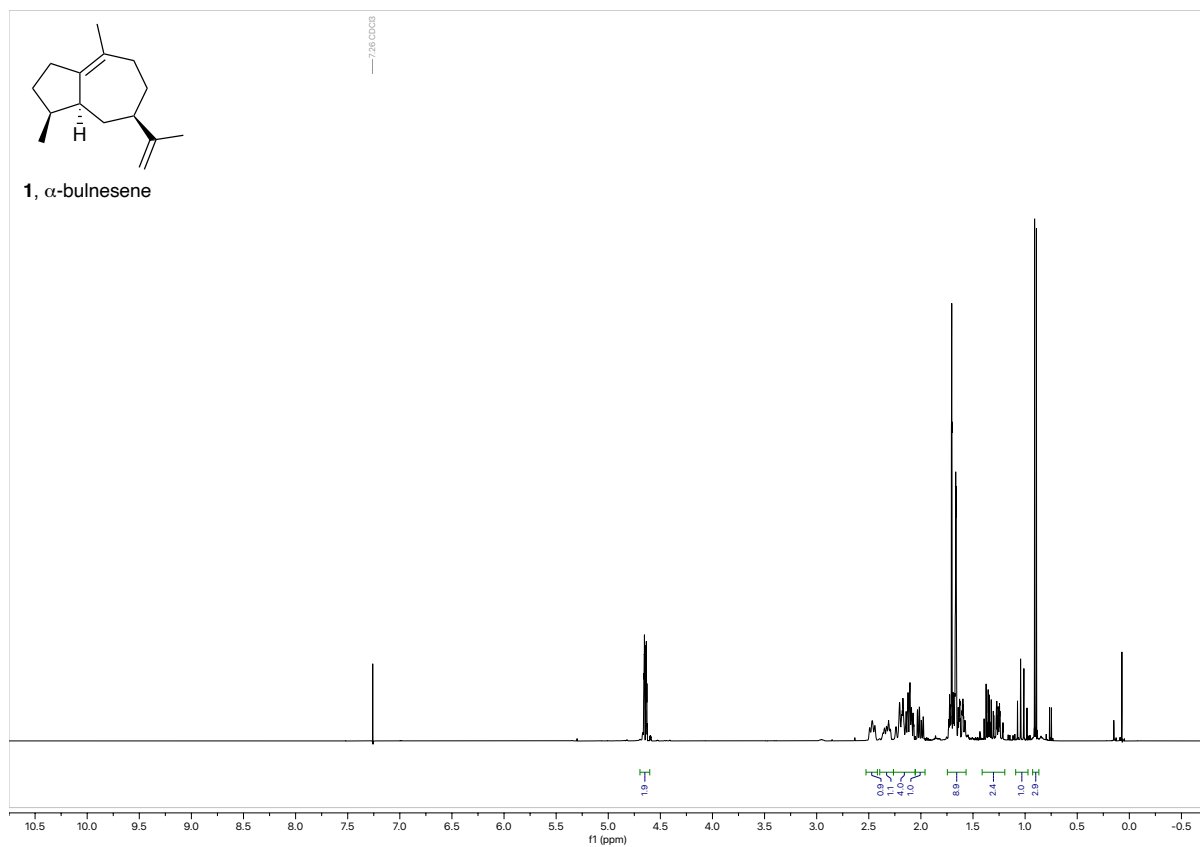

$^{13}\text{C}$  NMR (151 MHz,  $\text{CDCl}_3$ )

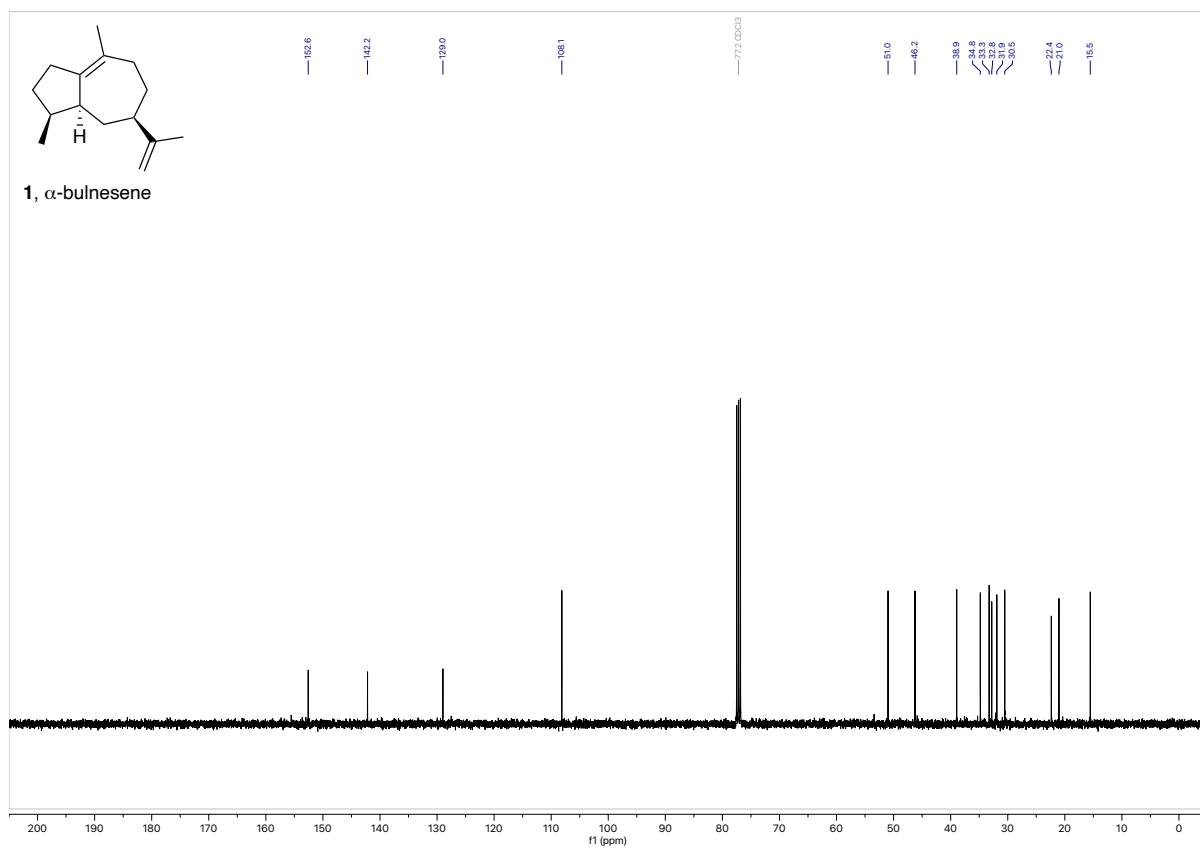

### Alkene regioisomers of compounds 9, 10, and 13

#### *(7R,4R)*-7-Methyl-4-(prop-1-en-2-yl)cyclohept-1-en-1-yl trifluoromethanesulfonate (**S1**)

LHMDS (2.4 mL, 1.0 M in THF, 2.4 mmol) was added dropwise to a stirred solution of ketone **7** (332 mg, 2.00 mmol) in dry THF (10 mL) at  $-78^{\circ}\text{C}$ . The solution was stirred at this temperature for 1 h then warmed to RT and stirred for another 2 h. A solution of Comins' reagent (1.10 g, 2.80 mmol) in dry THF (5 mL) was added and the mixture was stirred at RT for 14 h. The mixture was diluted with ether (20 mL) and washed with saturated aqueous  $\text{NH}_4\text{Cl}$  solution (10 mL) then brine (20 mL). The organic layer was dried ( $\text{MgSO}_4$ ), filtered, and concentrated. The residue was purified by column chromatography (pentane/ethyl acetate, 1000:1) to give the title compound (**S1**), a colourless oil (485 mg, 81%), as a 2.8:1 ratio of diastereomers.  $R_f$  0.28 (pentane);  $\nu_{\text{max}}/\text{cm}^{-1}$  2941m, 1413m, 1141m;  $\delta_{\text{H}}$  (400 MHz,  $\text{CDCl}_3$ ) [major diastereomer] 5.82 (1H, t,  $J = 7.0\text{ Hz}$ ), 4.69 (2H, s), 2.75–2.63 (1H, m), 2.39–2.30 (1H, m), 2.22 (2H, app t,  $J = 6.5\text{ Hz}$ ), 2.00–1.87 (2H, m), 1.70 (3H, s), 1.64–1.53 (2H, m), 1.21 (3H, d,  $J = 7.0\text{ Hz}$ );  $\delta_{\text{C}}$  (101 MHz,  $\text{CDCl}_3$ ) [major/minor] 155.7/156.4, 149.7/150.3, 120.4/120.5, 118.7 (q,  $J = 320\text{ Hz}$  (major)), 109.7/109.4, 45.0/45.5, 37.8/38.1, 30.8/31.3, 30.5/30.1, 28.0/29.1, 20.4/20.6, 17.5/17.1.

#### *(7R,4R)*-1-(But-3-yn-1-yl)-7-methyl-4-(prop-1-en-2-yl)cyclohept-1-ene (**S2**)

A solution of [4-(trimethylsilyl)but-3-yn-1-yl]magnesium bromide (0.420 mmol) (prepared as in the procedure for the preparation of compound **10**) in THF (6 mL) was added rapidly to a  $-30^{\circ}\text{C}$  solution of enol triflate **S1** (63 mg, 0.21 mmol),  $\text{Fe}(\text{acac})_3$  (7.5 mg, 0.021 mmol), and NMP (0.25 mL) in dry THF (5 mL) under  $\text{N}_2$ , causing an immediate colour change from orange to black. The mixture was stirred for 15 min and was then quenched with saturated aqueous  $\text{NH}_4\text{Cl}$  solution (5 mL). The aqueous phase was extracted with ether ( $3 \times 20\text{ mL}$ ), the combined organic layers were dried ( $\text{Na}_2\text{SO}_4$ ), and the solvent was evaporated. The residue was purified by column chromatography (pentane/ethyl acetate, 1000:1) to give the intermediate trimethylsilylalkyne as a colourless oil (44 mg, 76%) and as a 2.6:1 ratio of diastereomers. In a separate reaction, TBAF (2.4 mL, 1.0 M in THF, 2.4 mmol) was added into a solution of this intermediate (330 mg, 1.20 mmol) in dry THF (5 mL) and the mixture was stirred for 2 h at RT. The reaction was quenched with saturated aqueous  $\text{NH}_4\text{Cl}$  solution (10 mL) and the aqueous layer was extracted with ether ( $3 \times 10\text{ mL}$ ). The combined organic layers were dried ( $\text{MgSO}_4$ ), filtered, and concentrated. The residue was purified by column chromatography (pentane/ethyl acetate, 1000:1) to give the title compound (**S2**), a colourless oil (130 mg, 54%), as a 5.5:1 ratio of diastereomers.  $R_f$  0.31 (pentane);  $\nu_{\text{max}}/\text{cm}^{-1}$  3216m;  $\delta_{\text{H}}$  (400 MHz,  $\text{CDCl}_3$ ) [major diastereomer] 5.52–5.47 (1H, m), 4.68–4.65 (1H, m), 4.64–4.62 (1H, m), 2.49–2.38 (1H, m), 2.30–2.24 (2H, m), 2.24–2.08 (5H, m), 1.96 (1H, t,  $J = 2.5\text{ Hz}$ ), 1.93–1.84 (1H, m), 1.78–1.68 (1H, m) overlaying 1.70 (3H, s), 1.64–1.54 (1H, m), 1.46–1.36 (1H, m), 1.09 (3H, d,  $J = 7.0\text{ Hz}$ );  $\delta_{\text{C}}$  (101 MHz,  $\text{CDCl}_3$ ) [major diastereomer] 151.3, 145.2, 124.5, 108.6, 84.7, 68.5, 45.2, 36.5, 34.9, 32.7, 32.6, 31.5, 20.7, 18.9, 18.6.

#### *(7R,4R)*-1-(3-Iodobut-3-en-1-yl)-7-methyl-4-(prop-1-en-2-yl)cyclohept-1-ene (**S3**)

DIBAL (0.83 mL, 1.2 M in toluene, 1.0 mmol) was added dropwise to a solution of  $\text{Ni}(\text{dppp})\text{Cl}_2$  (54 mg, 0.10 mmol) in dry THF (15 mL) under Ar. The mixture was cooled to  $0^{\circ}\text{C}$  and alkyne **S2** (101 mg, 0.499 mmol) was added via syringe into the black solution; the mixture was warmed to RT and stirred for 4 h then cooled

to 0 °C. A solution of *N*-iodosuccinimide (338 mg, 1.50 mmol) in THF (5 mL) was added dropwise then the solution was warmed to RT and stirred for 18 h. The reaction was quenched with saturated aqueous Rochelle's salt solution (10 mL), the aqueous phase was extracted with ether (3 × 20 mL), and the combined organic extracts were dried (MgSO<sub>4</sub>), filtered, and concentrated. The residue was purified by column chromatography (pentane/triethylamine, 100:1) to give vinyl iodide **S3** as a colourless oil (76 mg, 46%), isolated as a single (unassigned) diastereomer. *R<sub>f</sub>* 0.50 (pentane);  $\nu_{\text{max}}/\text{cm}^{-1}$  2961m, 2929m, 889m;  $\delta_{\text{H}}$  (400 MHz, CDCl<sub>3</sub>) 6.01 (1H, q, *J* = 1.5 Hz), 5.68 (1H, app d, *J* = 1.5 Hz), 5.51–5.46 (1H, m), 4.67–4.61 (2H, m), 2.47 (2H, t, *J* = 7.5, 1.5 Hz), 2.47–2.37 (1H, m), 2.25–2.08 (5H, m), 1.94–1.83 (1H, m), 1.78–1.67 (1H, m) overlaying 1.69 (3H, s), 1.64–1.54 (1H, m), 1.46–1.36 (1H, m), 1.11 (3H, d, *J* = 7.0 Hz);  $\delta_{\text{C}}$  (101 MHz, CDCl<sub>3</sub>) 151.3, 144.9, 125.5, 124.6, 112.2, 108.6, 45.4, 45.2, 36.7, 35.9, 32.6, 32.5, 31.5, 20.7, 18.9.

$^1\text{H}$  NMR (400 MHz,  $\text{CDCl}_3$ ) [dr ~2.8:1]

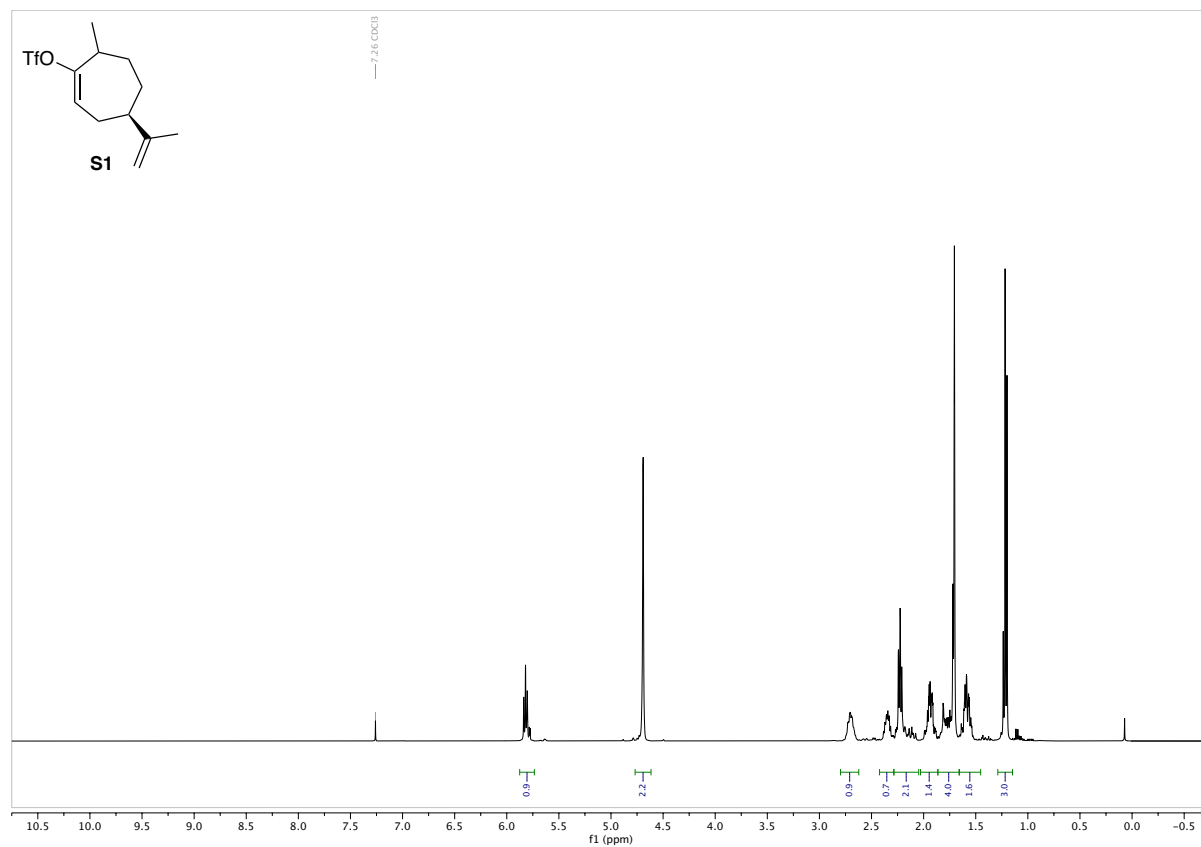

$^{13}\text{C}$  NMR (101 MHz,  $\text{CDCl}_3$ ) [dr ~2.8:1]

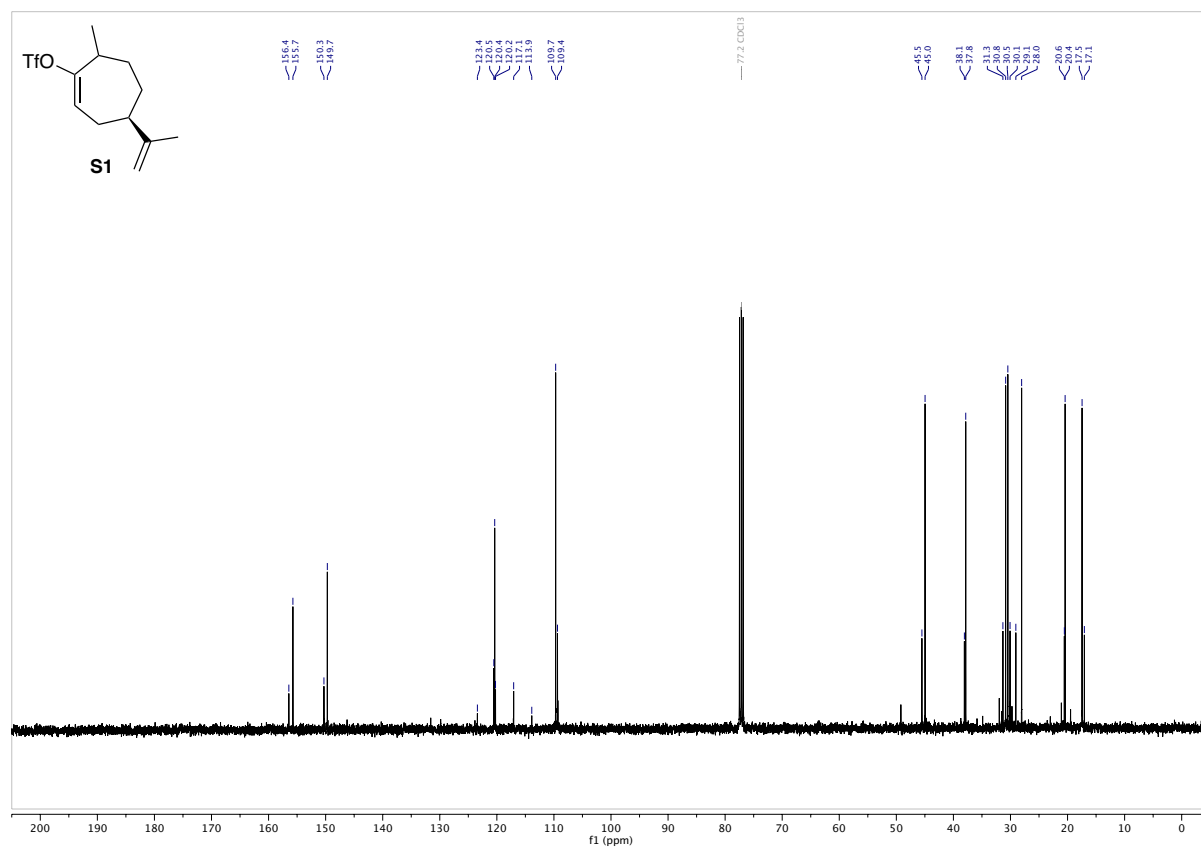

$^1\text{H}$  NMR (400 MHz,  $\text{CDCl}_3$ ) [contains BHT stabiliser]

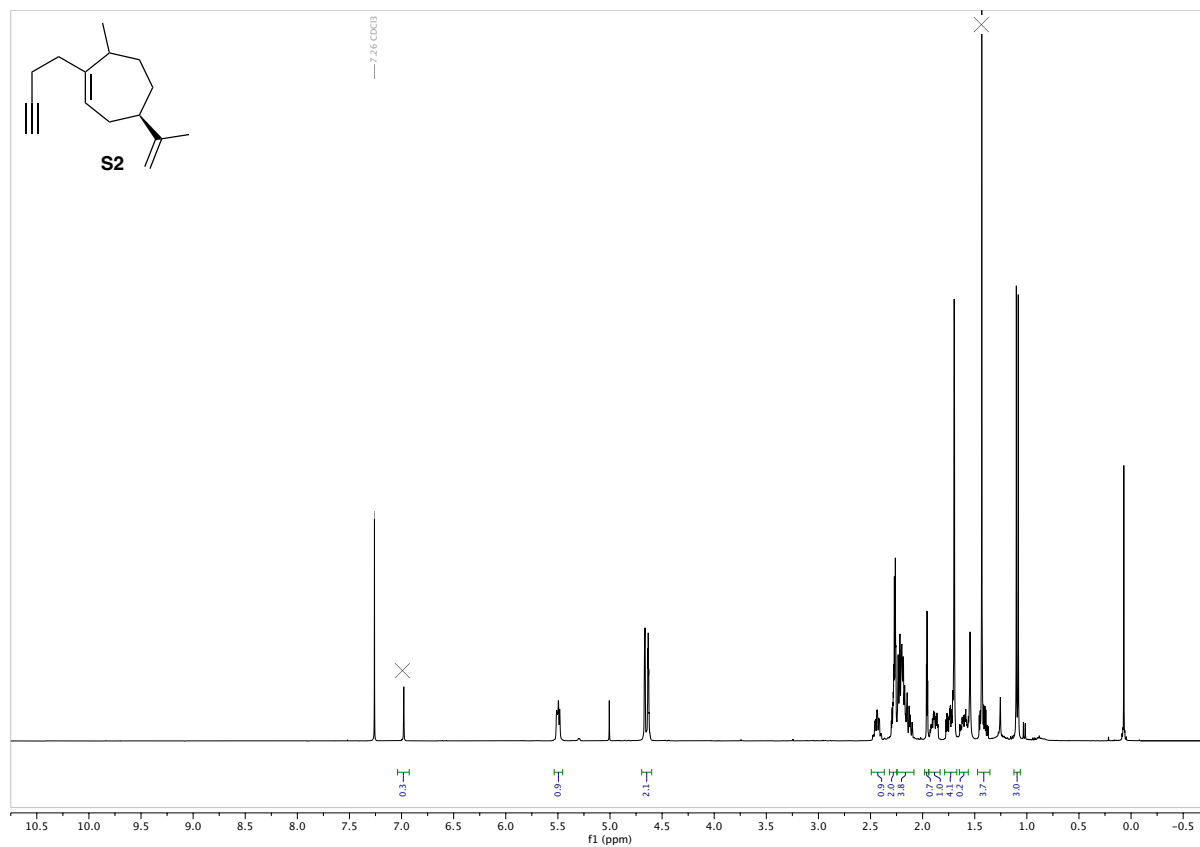

$^{13}\text{C}$  NMR (101 MHz,  $\text{CDCl}_3$ )

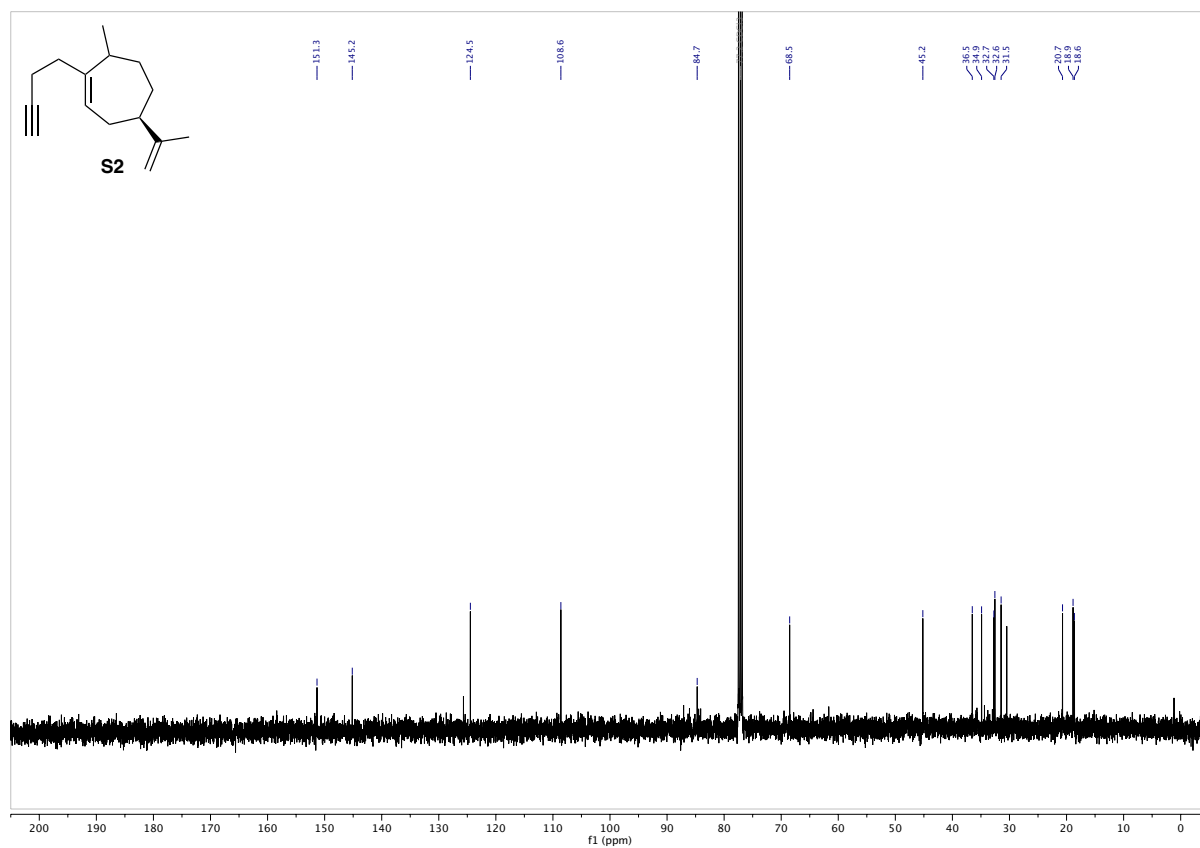

$^1\text{H}$  NMR (400 MHz,  $\text{CDCl}_3$ )

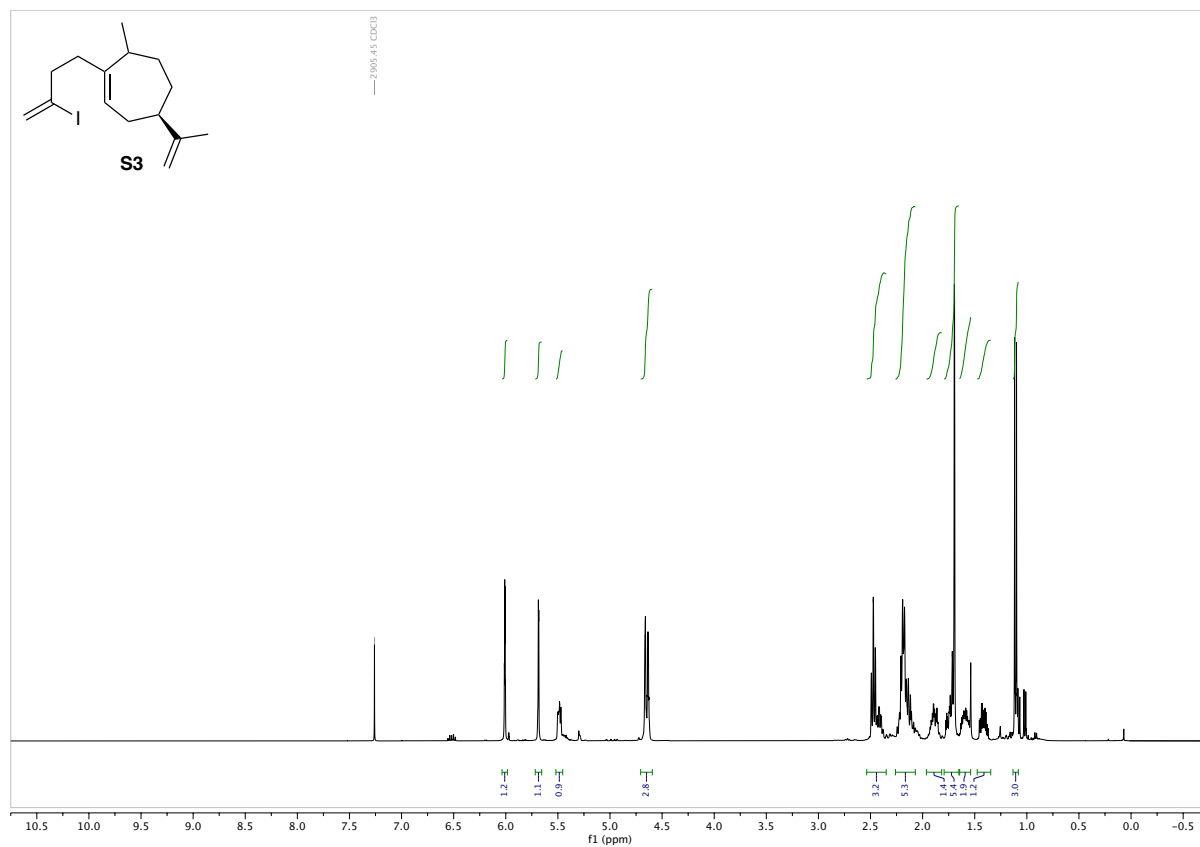

$^{13}\text{C}$  NMR (101 MHz,  $\text{CDCl}_3$ )

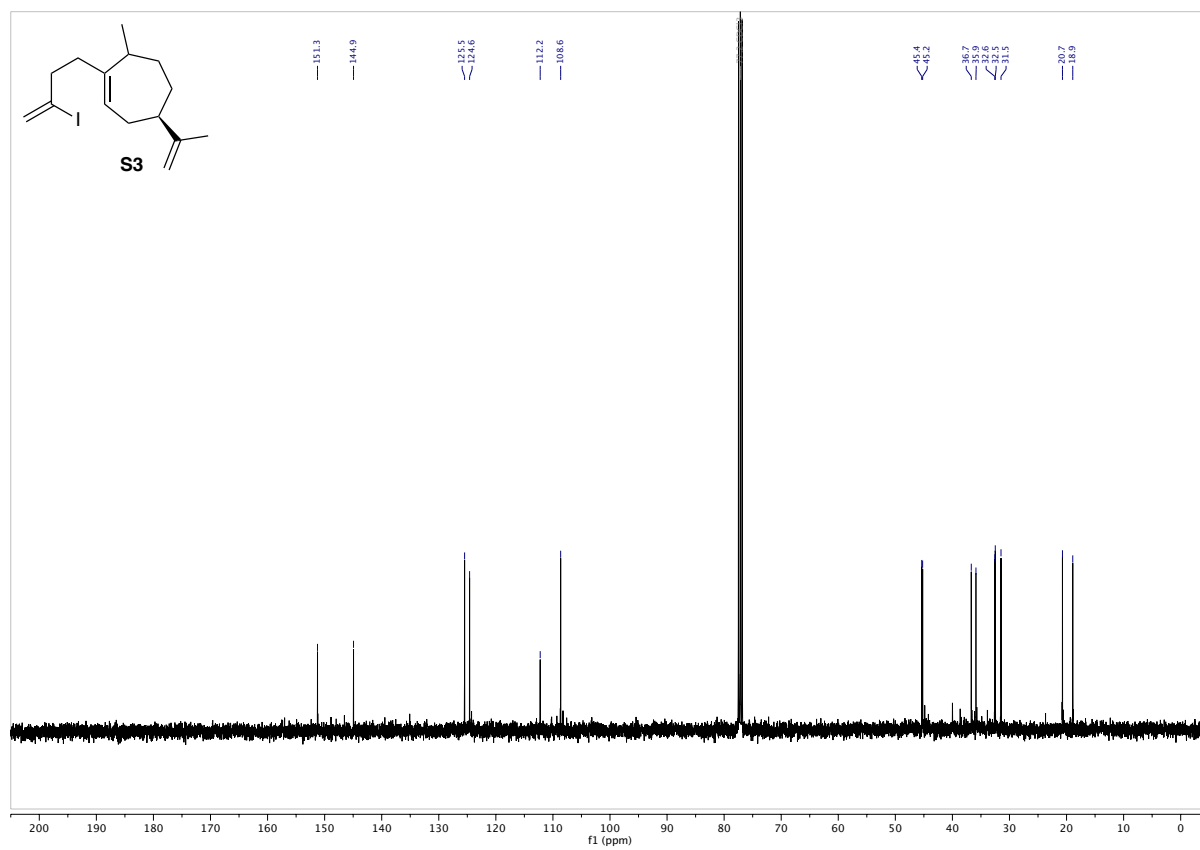

## Optimisation of the butenylation reaction leading to ketone 18

**Table S1.** Direct butenylation of enone **14**.

Conditions trialled for the deprotonation of enone **14** and enolate alkylation with  $\text{CH}_2=\text{CHCH}_2\text{CH}_2\text{X}$ .

| Entry | Base (eq.)                    | Additive (eq.) | Solvent | X (eq.)  | T / °C   | Time / h | Yield of 18 |
|-------|-------------------------------|----------------|---------|----------|----------|----------|-------------|
| 1     | <i>t</i> -BuOK (1.2)          | HMPA (30)      | THF     | I (1.5)  | 20       | 18       | 25          |
| 2     | <i>t</i> -BuOK (1.1)          | NaI (0.5)      | THF     | Br (1.2) | 20       | 18       | trace       |
| 3     | NaH (2)                       | –              | THF     | I (2)    | 20 → 60  | 3        | 11          |
| 4     | NaH (2)                       | –              | THF     | I (2)    | 66       | 48       | trace       |
| 5     | KHMDS (1.2)                   | HMPA (4.5)     | THF     | Br (1.3) | –78 → 20 | 18       | trace       |
| 6     | KHMDS (1.2)                   | –              | THF     | I (18)   | –78 → 20 | 2        | 13          |
| 7     | NaH (2), <i>t</i> -BuOK (1.2) | DMPU (10)      | Toluene | Br (1.3) | 20       | 2        | trace       |

**Table S2.** Direct butenylation of enone **13**.

Conditions trialled for the deprotonation of enone **13** and enolate alkylation with  $\text{CH}_2=\text{CHCH}_2\text{CH}_2\text{X}$ .

| Entry | Base (eq.)            | Additive (eq.) | Solvent        | X (eq.)  | T / °C              | Time / h | Yield of 18 |
|-------|-----------------------|----------------|----------------|----------|---------------------|----------|-------------|
| 1     | <i>t</i> -BuOK (1.4)  | –              | THF            | I (1.5)  | 20                  | 18       | 25          |
| 2     | <i>t</i> -BuOK (1.1)  | DMPU (12)      | DMF            | I (1.3)  | 20                  | 18       | 21          |
| 3     | LHMDS (1.25)          | –              | THF            | I (1.3)  | 20                  | 18       | trace       |
| 4     | <i>t</i> -BuONa (1.2) | –              | THF            | I (1.3)  | 20                  | 18       | trace       |
| 5     | KHMDS (1.2)           | –              | DMF            | I (1.5)  | 20                  | 18       | trace       |
| 6     | LHMDS (1.25)          | –              | DMF            | I (1.5)  | –30 → 20            | 18       | trace       |
| 7     | <i>t</i> -BuOK (1.2)  | –              | DMF            | Br (1.3) | 20                  | 18       | 16          |
| 8     | <i>t</i> -BuOK (1.2)  | –              | DMF            | Br (1.3) | 20 → 0 <sup>a</sup> | 2        | 10          |
| 9     | <i>t</i> -BuOK (1.2)  | –              | <i>t</i> -BuOH | Br (1.3) | 20                  | 6        | trace       |

<sup>a</sup> The base was added at 20 °C; after enolisation, the mixture was cooled to 0 °C and the electrophile added.

**Table S3:** Alkylation of enone **14** with 1,4-dihalobut-2-ene.

Conditions trialled for the deprotonation of enone **14** and enolate alkylation with (*E*)- $\text{XCH}_2\text{CH}=\text{CHCH}_2\text{X}$ .

| Entry | Base (eq.)                    | Additive (eq.) | Solvent | X (eq.)  | T / °C   | Time / h | Yield of 18 |
|-------|-------------------------------|----------------|---------|----------|----------|----------|-------------|
| 1     | KHMDS (1.2)                   | –              | THF     | Cl (1.5) | –78 → 20 | 2        | trace       |
| 2     | KHMDS (1.2)                   | HMPA (4)       | THF     | Cl (1.3) | –78 → 20 | 2        | 25%         |
| 3     | KHMDS (1.2)                   | –              | THF     | Br (5)   | –78 → 20 | 18       | mixture     |
| 4     | KHMDS (1.2)                   | DMPU (10)      | THF     | Cl (2)   | –78 → 20 | 6        | trace       |
| 5     | LDA (1.3)                     | DMPU (1.1)     | THF     | Cl (4)   | –78 → 20 | 18       | trace       |
| 6     | NaH (2), <i>t</i> -BuOK (1.1) | –              | Toluene | Br (1.5) | 20       | 2        | 33%         |
| 7     | NaH (2), <i>t</i> -BuOK (1.1) | –              | Toluene | Br (4)   | –78 → 20 | 2        | 73%         |

**Table S4:** Reductive rearrangement of ketone **15**.

Conditions trialled for the conversion of vinyl cyclopropane derivative **15** into **18**, minimising the co-production of vinylidihydrofuran derivative **17**.

| Entry | Pd <sub>2</sub> dba <sub>3</sub><br>(mol%) | Bu <sub>3</sub> P<br>(mol%) | Reducing agent (eq.)                                            | T / °C | Ratio 18:17<br>(NMR) | Yield of 18    |
|-------|--------------------------------------------|-----------------------------|-----------------------------------------------------------------|--------|----------------------|----------------|
| 1     | 10                                         | 80                          | HCO <sub>2</sub> NH <sub>4</sub> (2.2)                          | 105    | 100:0                | 31 (mixture)   |
| 2     | 2                                          | —                           | HCO <sub>2</sub> NH <sub>4</sub> (2.2)                          | 105    | —                    | 0              |
| 3     | 2                                          | 16                          | HCO <sub>2</sub> NH <sub>4</sub> (2.2)                          | 105    | 17:83                | (not isolated) |
| 4     | 2                                          | 16                          | Et <sub>2</sub> Zn (3)                                          | 75     | 0:100                | 0              |
| 5     | 2                                          | 16                          | HCO <sub>2</sub> NH <sub>4</sub> (2.2) + H <sub>2</sub> O (2)   | 105    | 27:73                | (not isolated) |
| 6     | 2                                          | 16                          | HCO <sub>2</sub> NH <sub>4</sub> (2.2) + H <sub>2</sub> O (55)  | 105    | 27:73                | (not isolated) |
| 7     | 2                                          | 16                          | HCO <sub>2</sub> H (5) + HCO <sub>2</sub> NH <sub>4</sub> (2.2) | 105    | 50:50                | (not isolated) |
| 8     | 2                                          | 16                          | HCO <sub>2</sub> H (5) + Et <sub>3</sub> N (2)                  | 105    | 80:20                | (not isolated) |
| 9     | 2                                          | 16                          | HCO <sub>2</sub> H (7) + Et <sub>3</sub> N (2)                  | 105    | 80:20                | 51             |
| 10    | 2                                          | 16                          | HCO <sub>2</sub> H (14) + Et <sub>3</sub> N (4)                 | 105    | 100:0                | 89             |
